# Supplementary material
Source: PubMed Central journal article supplement (PMC10240386)

Data S1. Characterization of compounds and extended raw data. Related to "Compound synthesis and characterization" section in STAR Methods.

NMR

<sup>1</sup>H NMR of compound 9

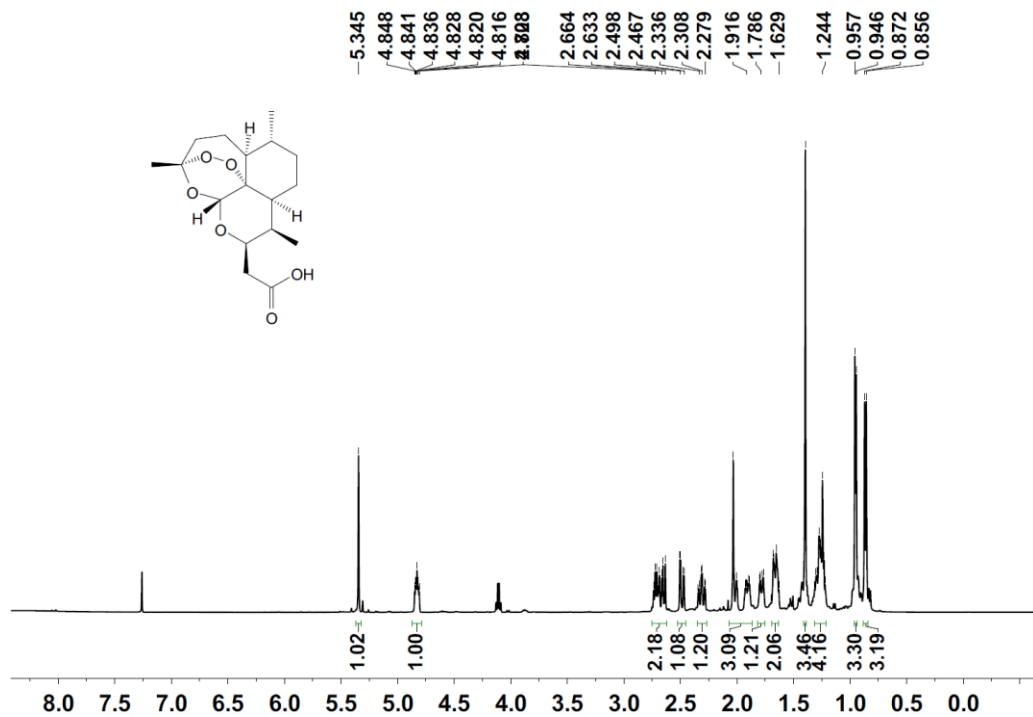

<sup>13</sup>C NMR of compound 9

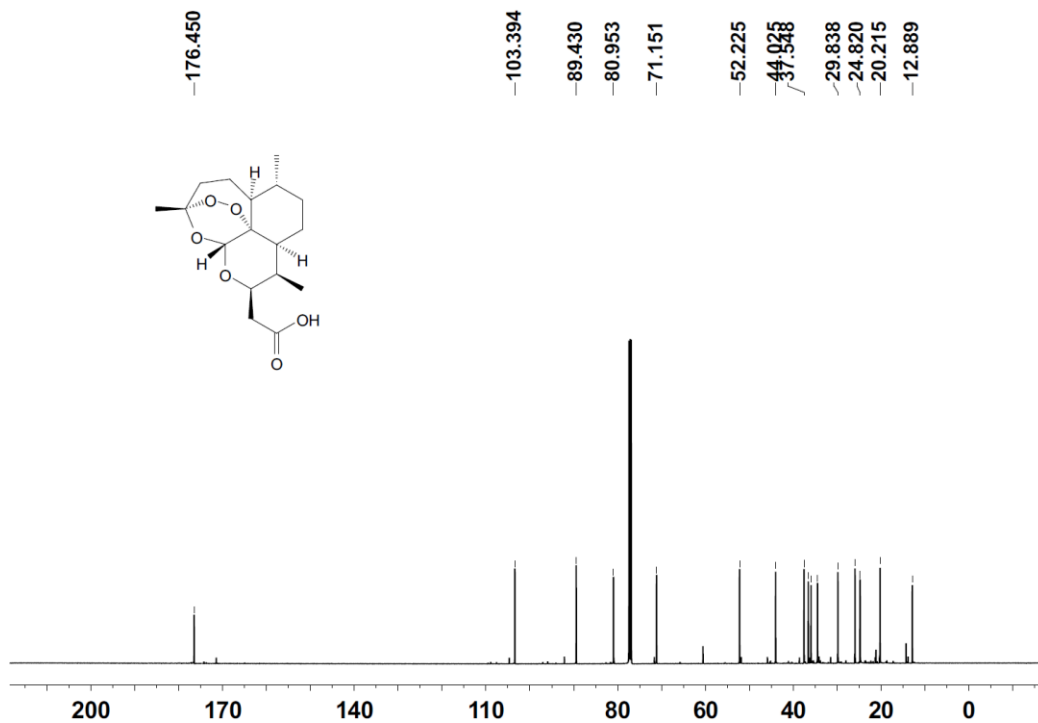

<sup>1</sup>H NMR of compound WZ-0917

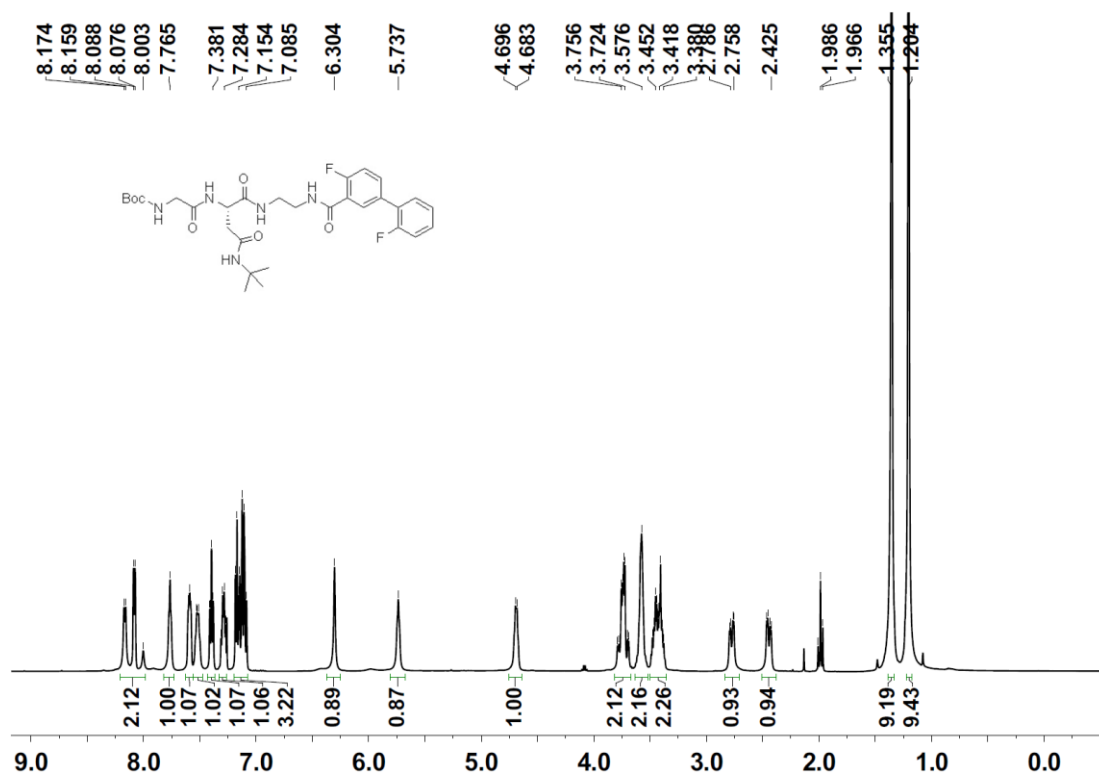

<sup>13</sup>C NMR of compound WZ-0917

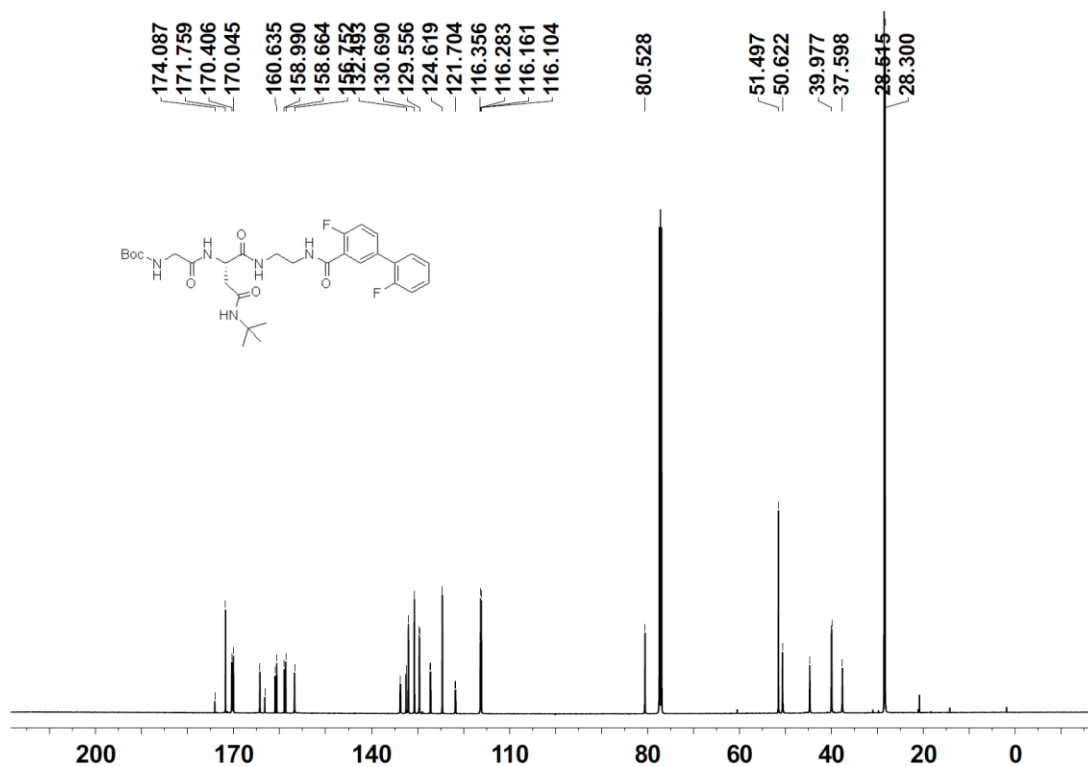

<sup>1</sup>H NMR of compound WZ-183 (PI01)

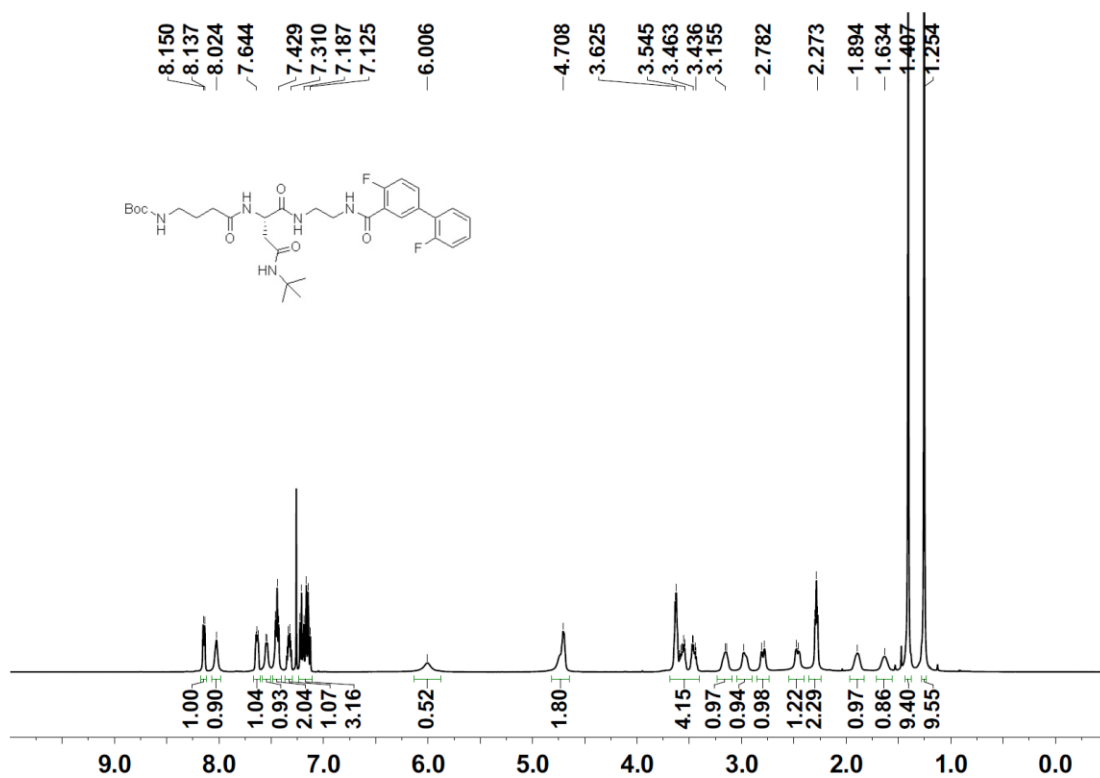

<sup>13</sup>C NMR of compound WZ-183 (PI01)

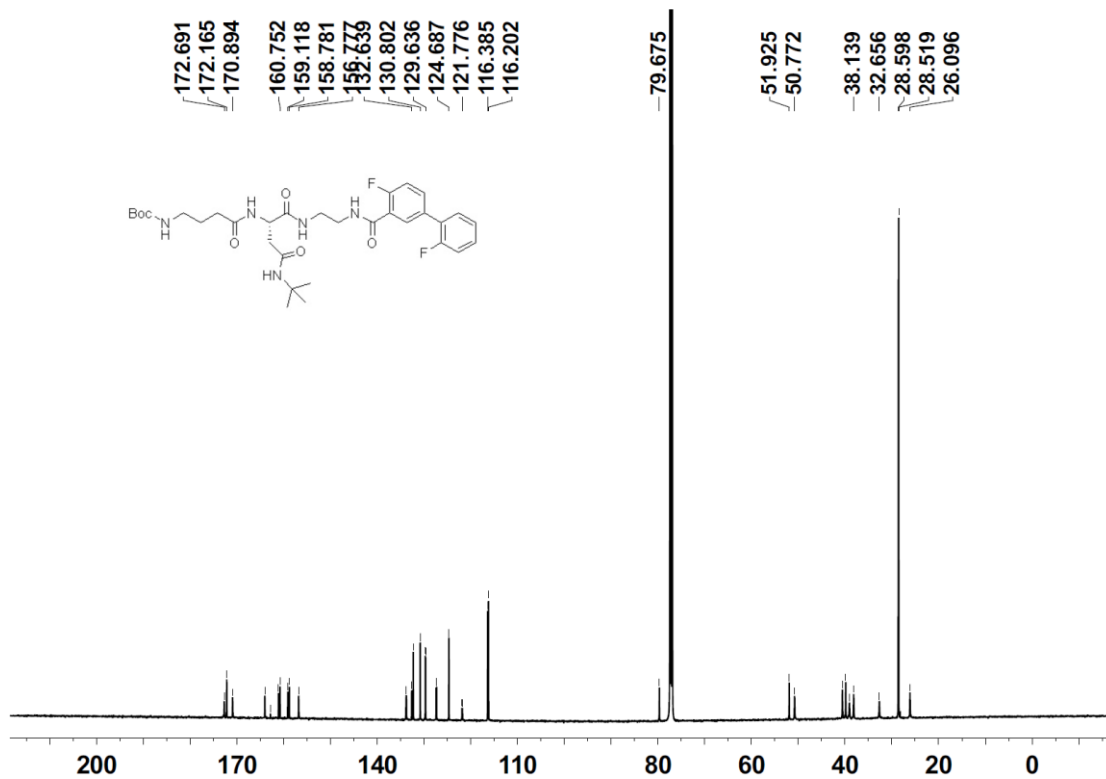

# <sup>1</sup>H NMR of ART1

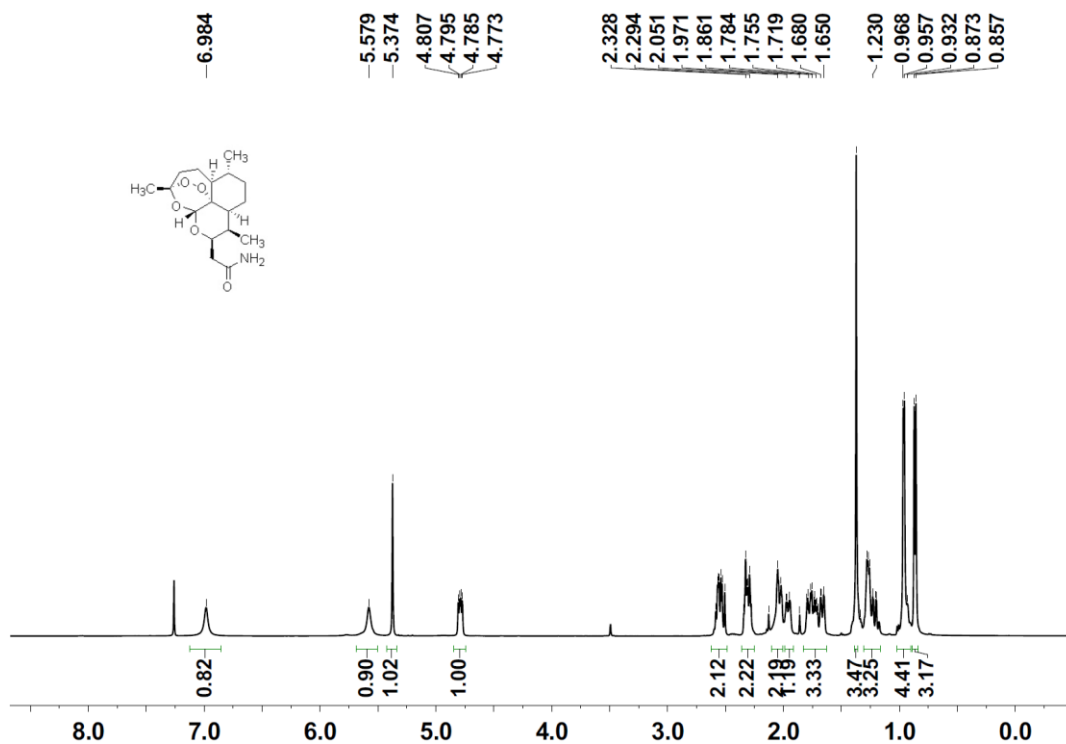

# <sup>13</sup>C NMR of ART1

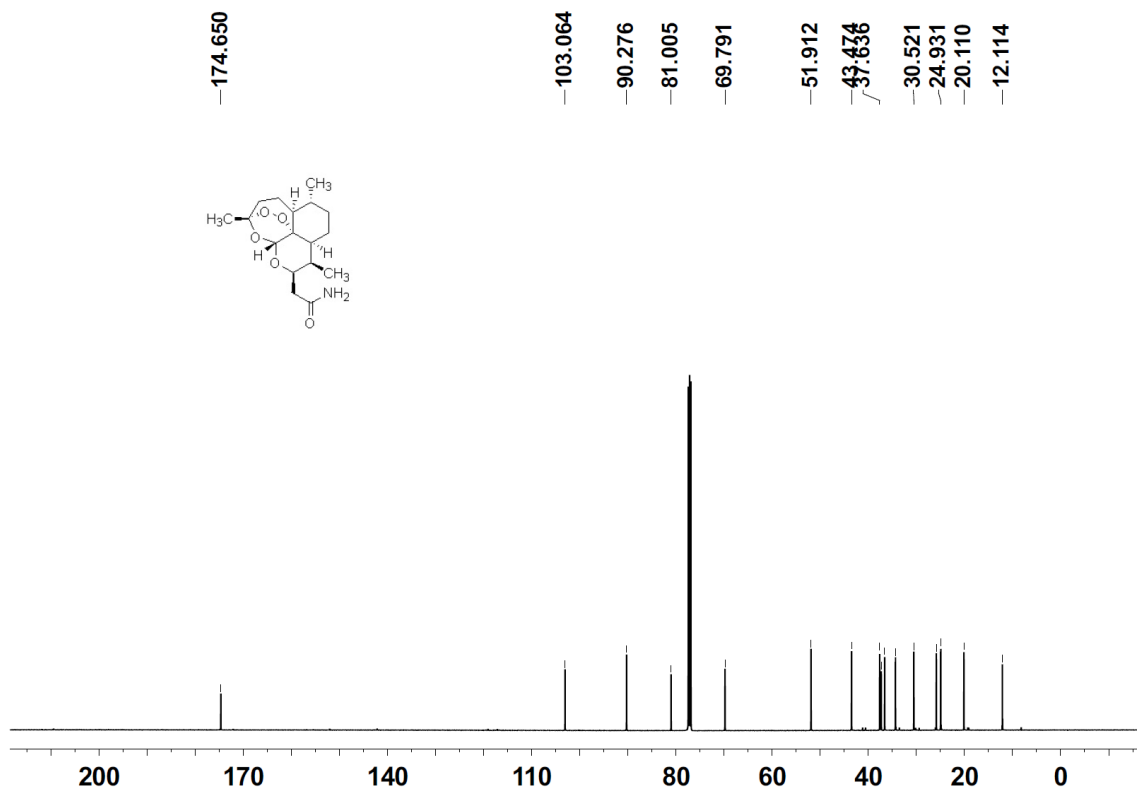

<sup>1</sup>H NMR of ATZ2

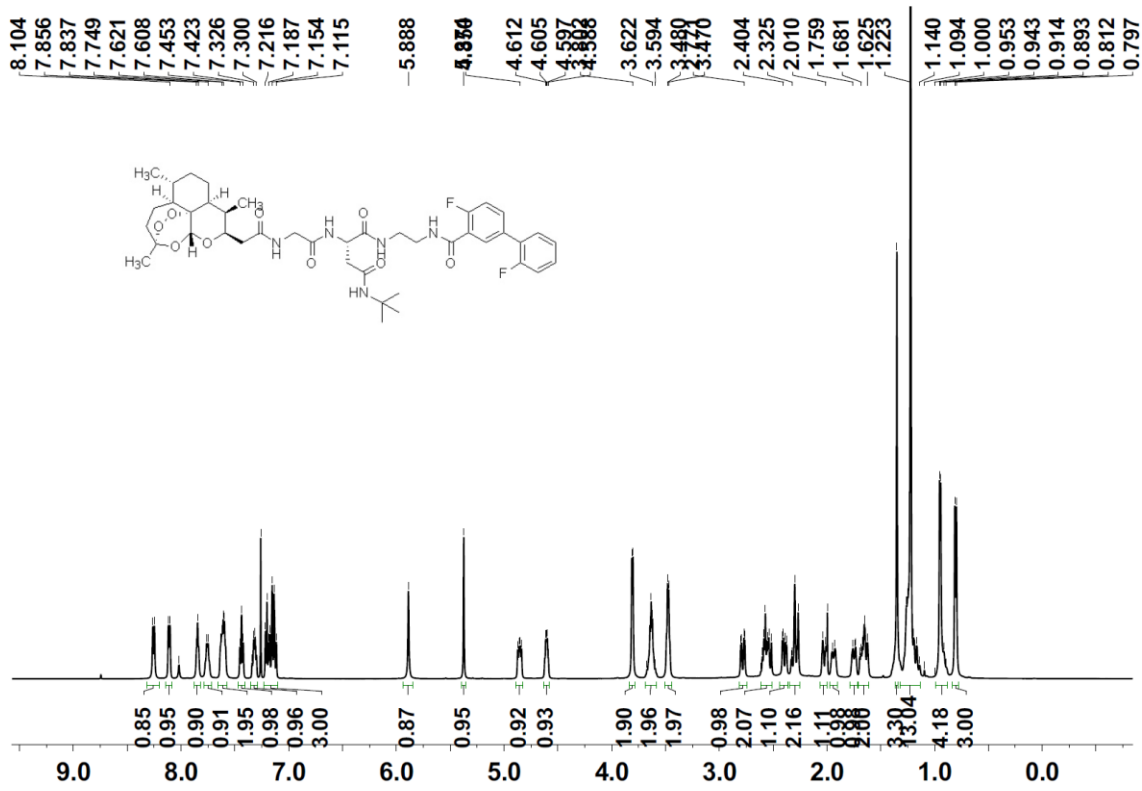

<sup>13</sup>C NMR of ATZ2

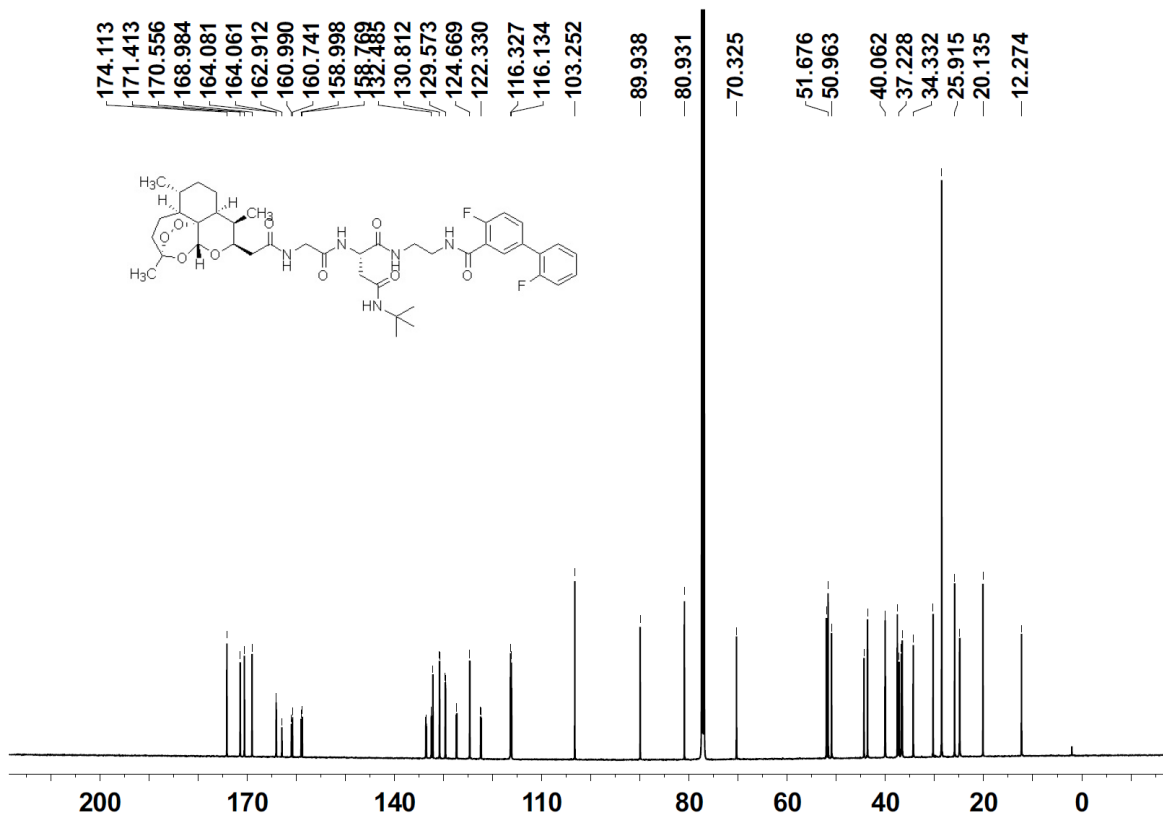

<sup>1</sup>H NMR of ATZ4

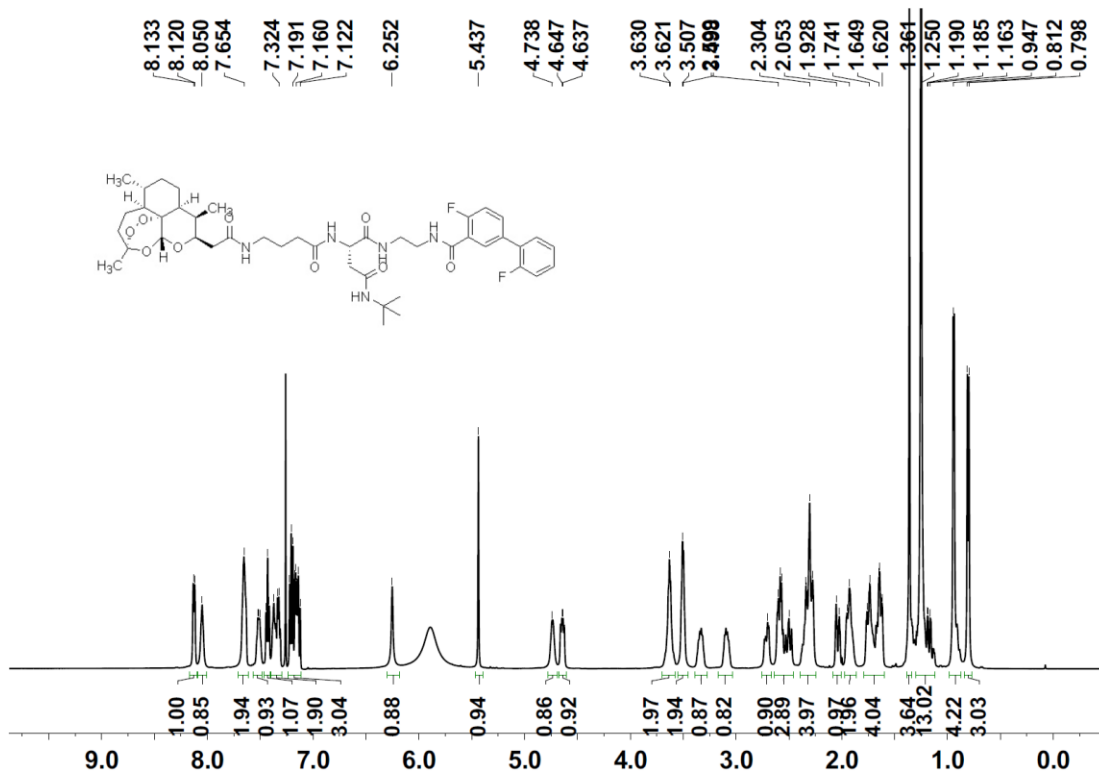

<sup>13</sup>C NMR of ATZ4

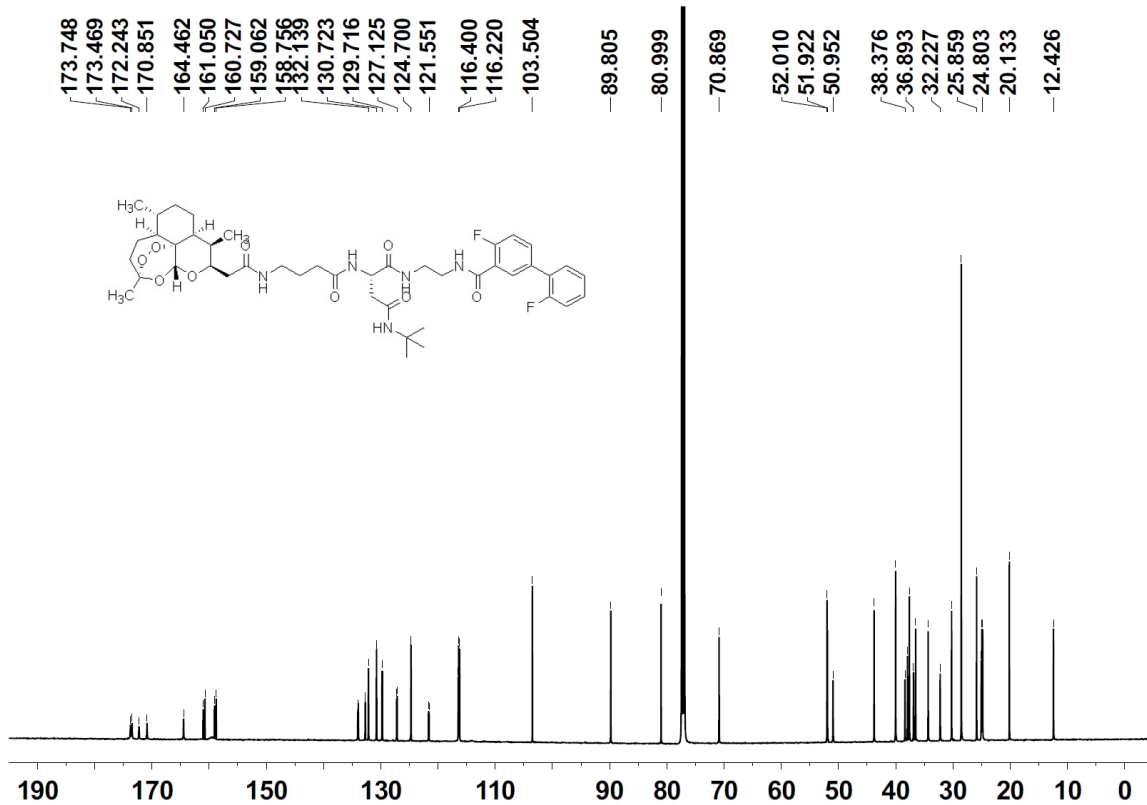

<sup>1</sup>H NMR of compound 10 (deoxy-ART-AcOH)

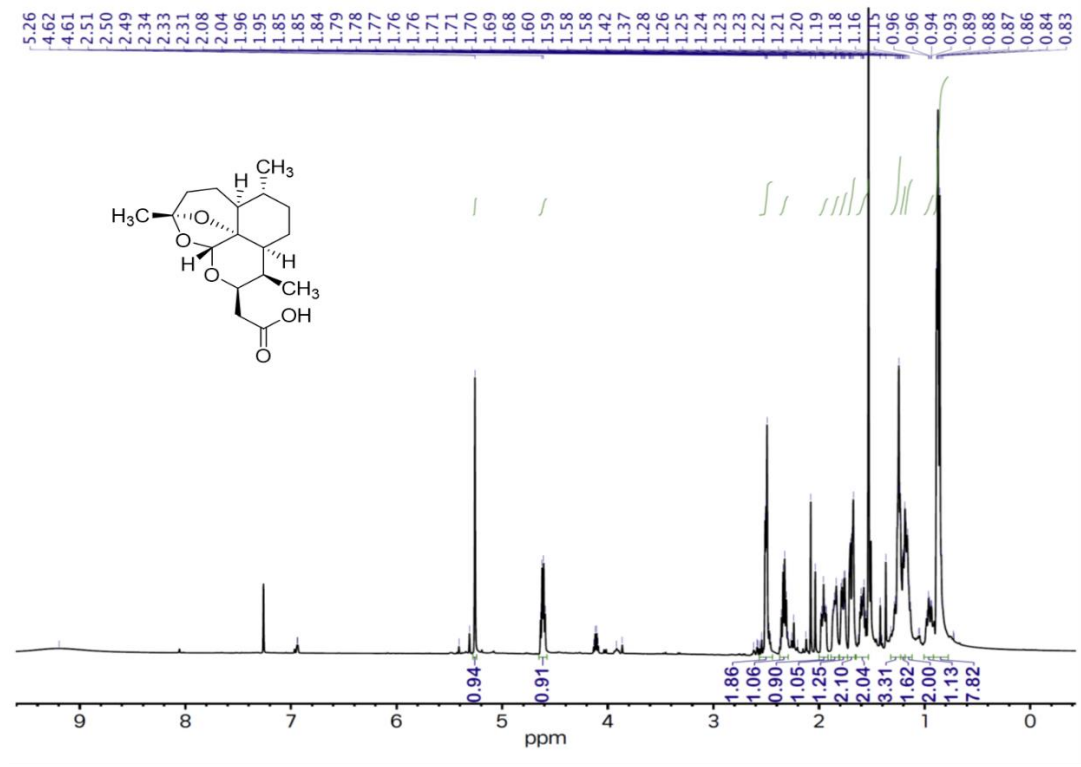

<sup>13</sup>C NMR of compound 10 (deoxy-ART-AcOH)

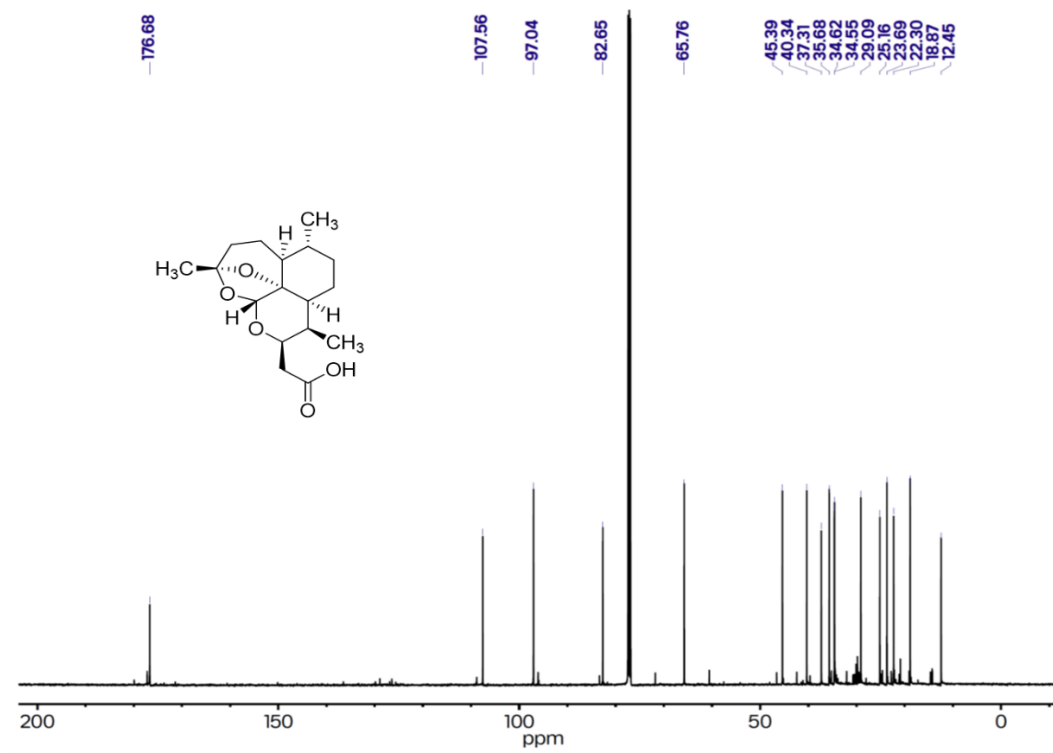

# <sup>1</sup>H NMR of deoxy-ATZ4

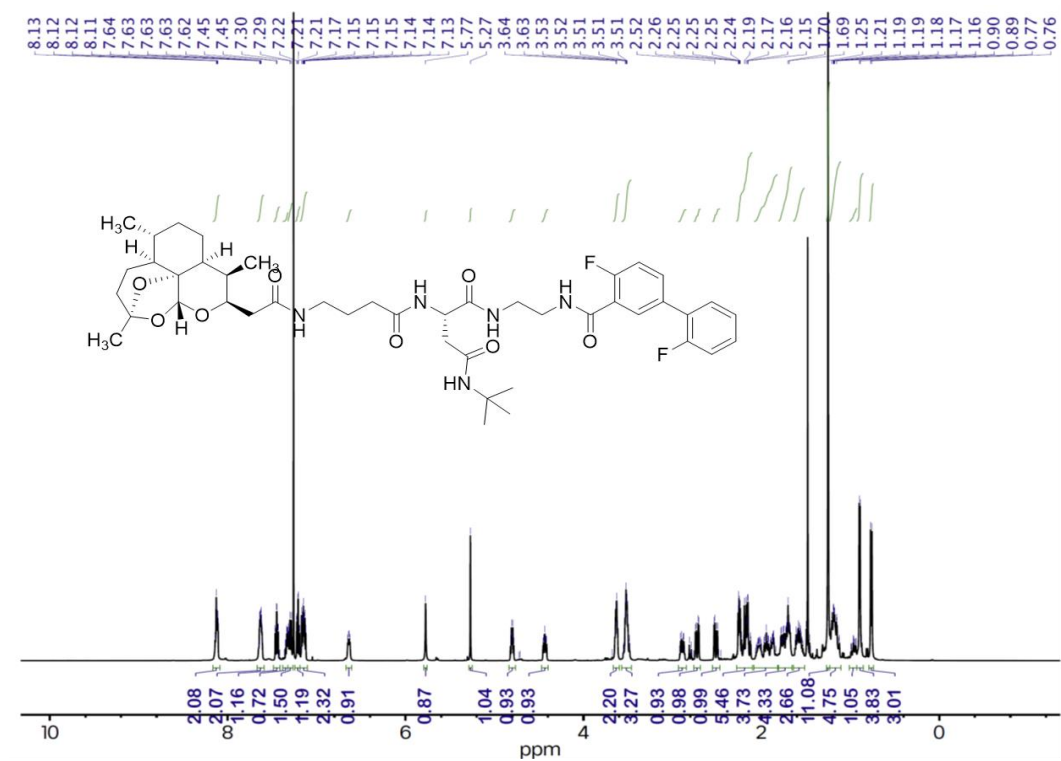

# <sup>13</sup>C NMR of deoxy-ATZ4

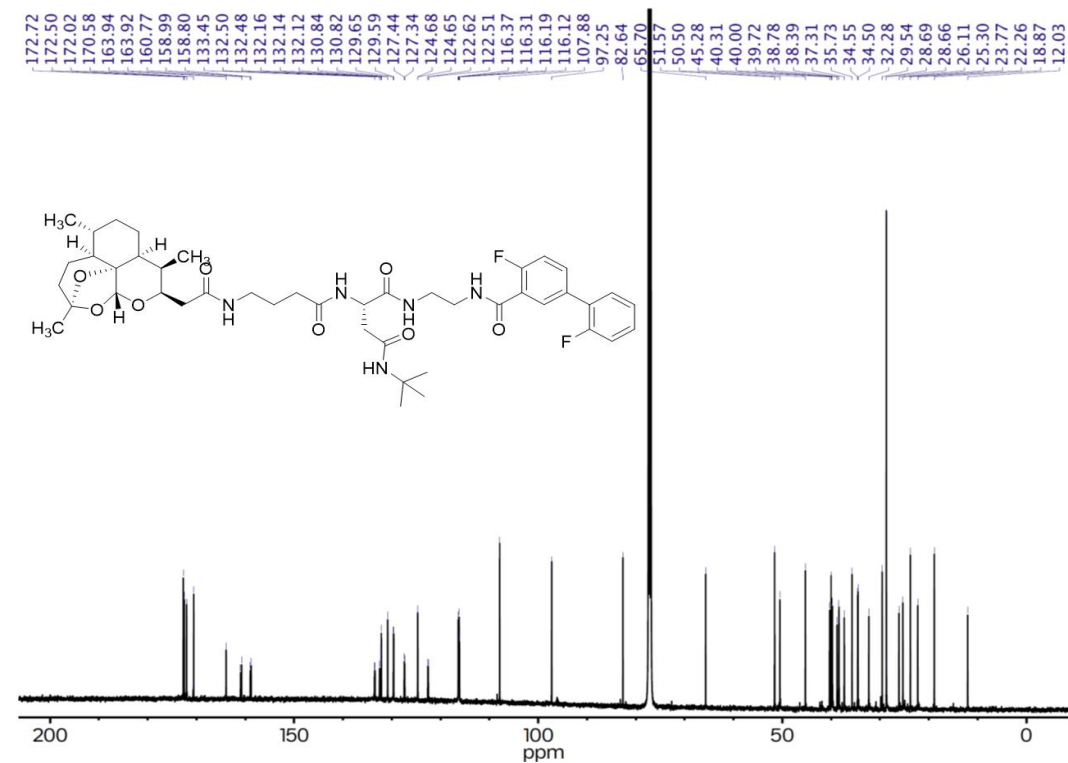



# <sup>1</sup>H NMR of ATZ-P1

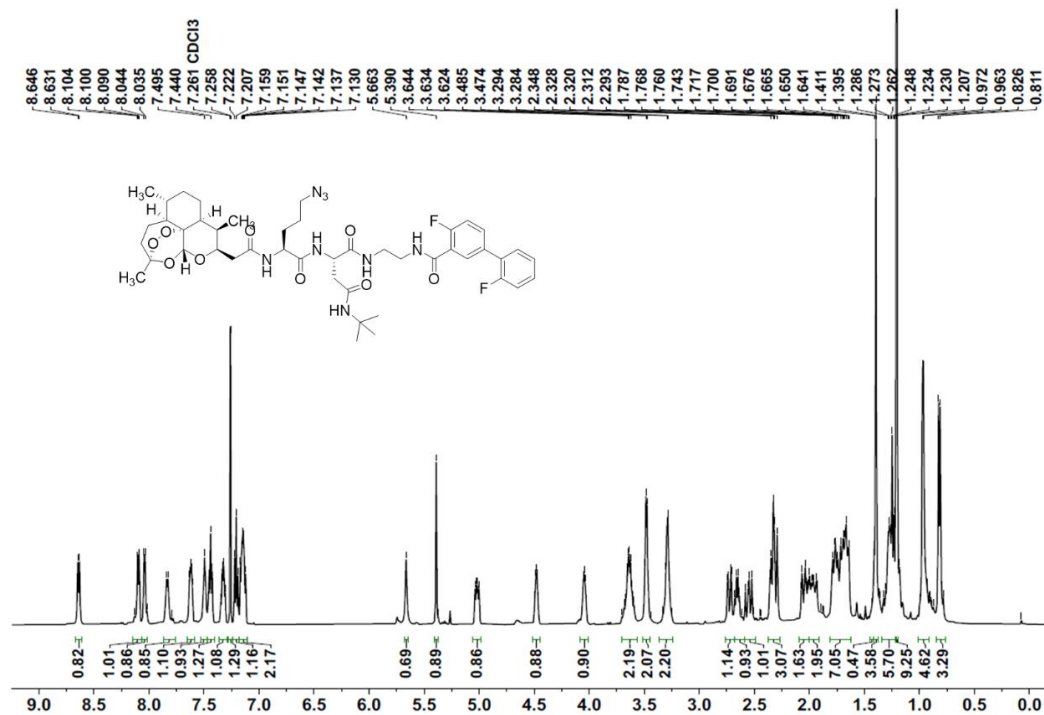

# <sup>13</sup>C NMR of ATZ-P1

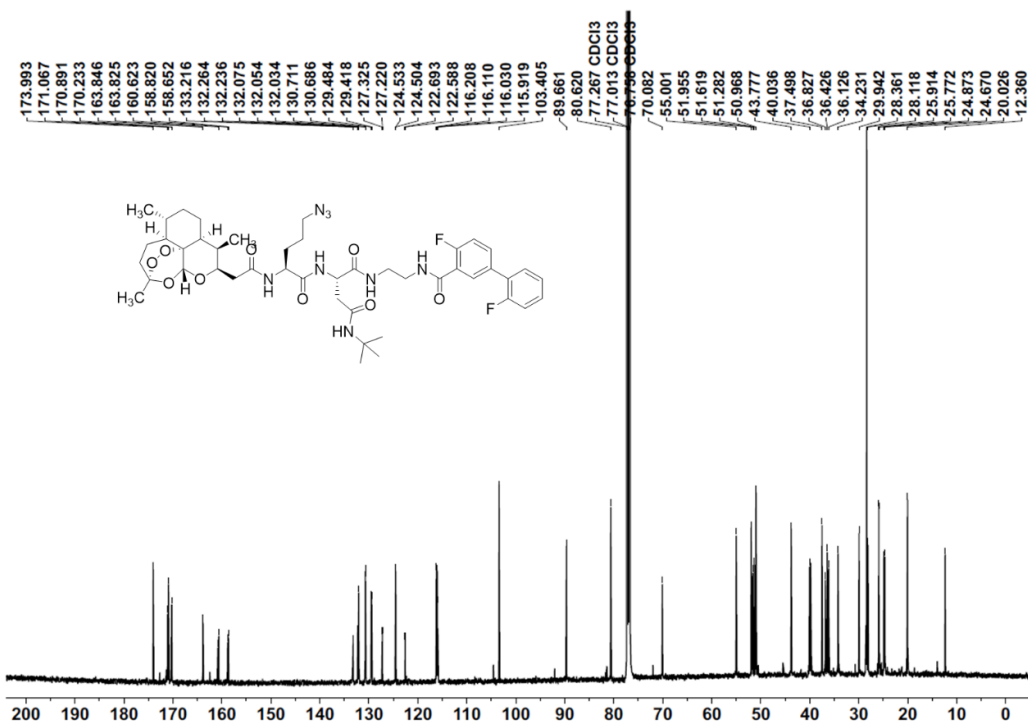

<sup>1</sup>H NMR of deoxy-ATZ-P1

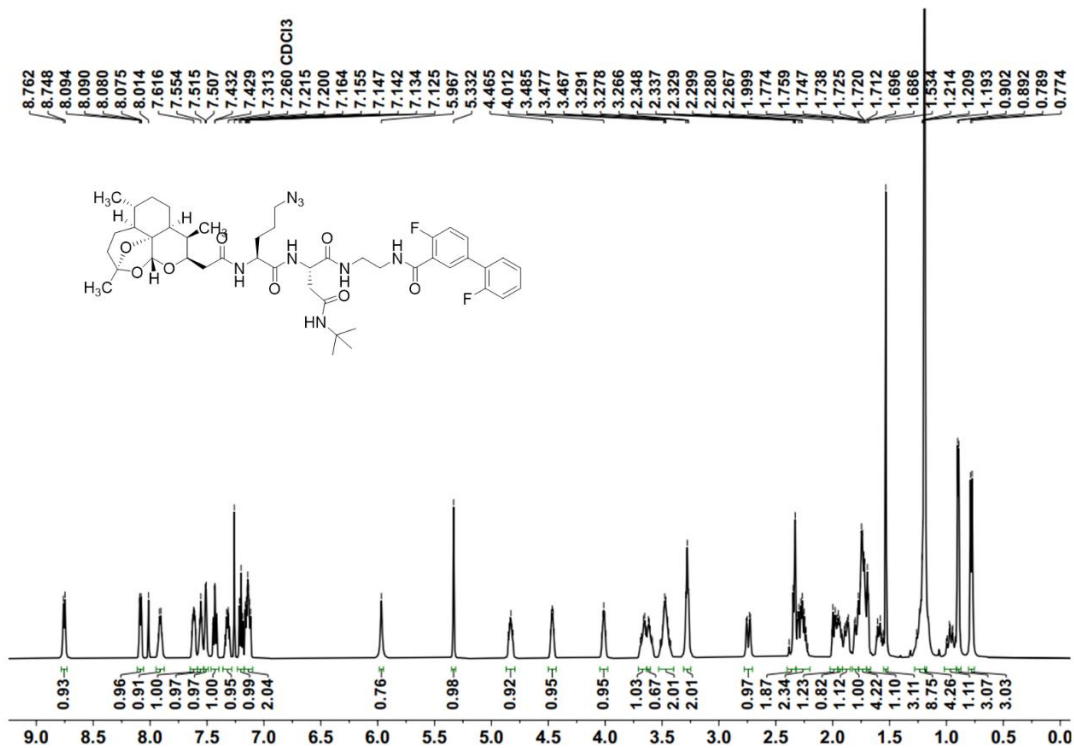

<sup>13</sup>C NMR of deoxy-ATZ-P1

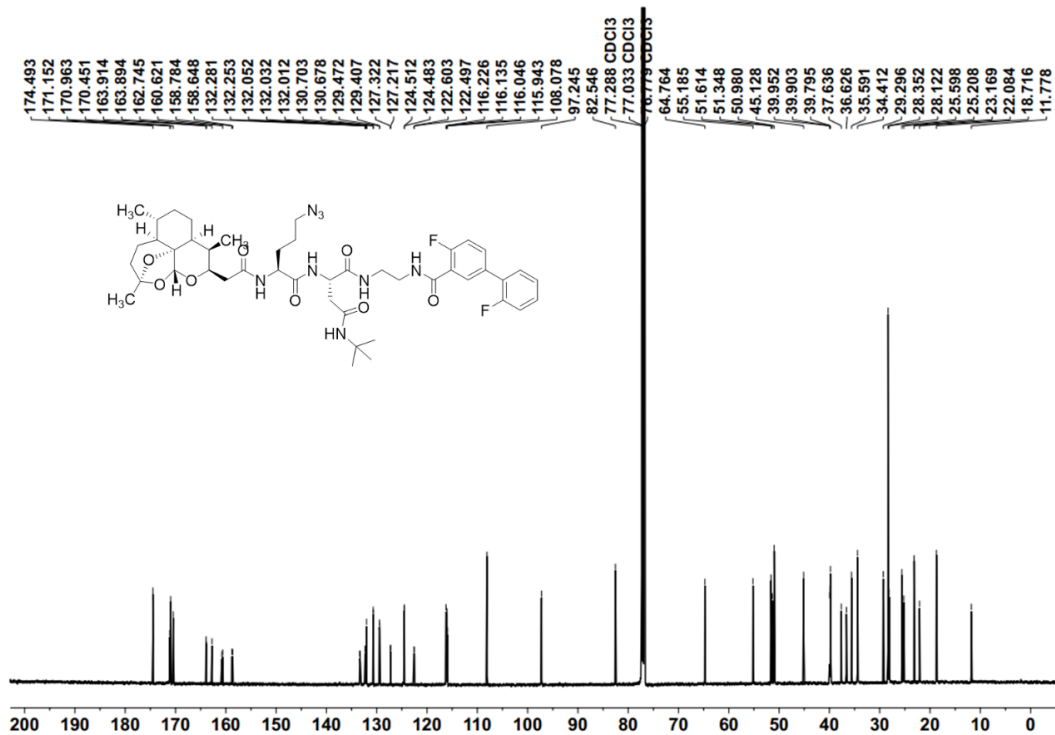

# LCMS

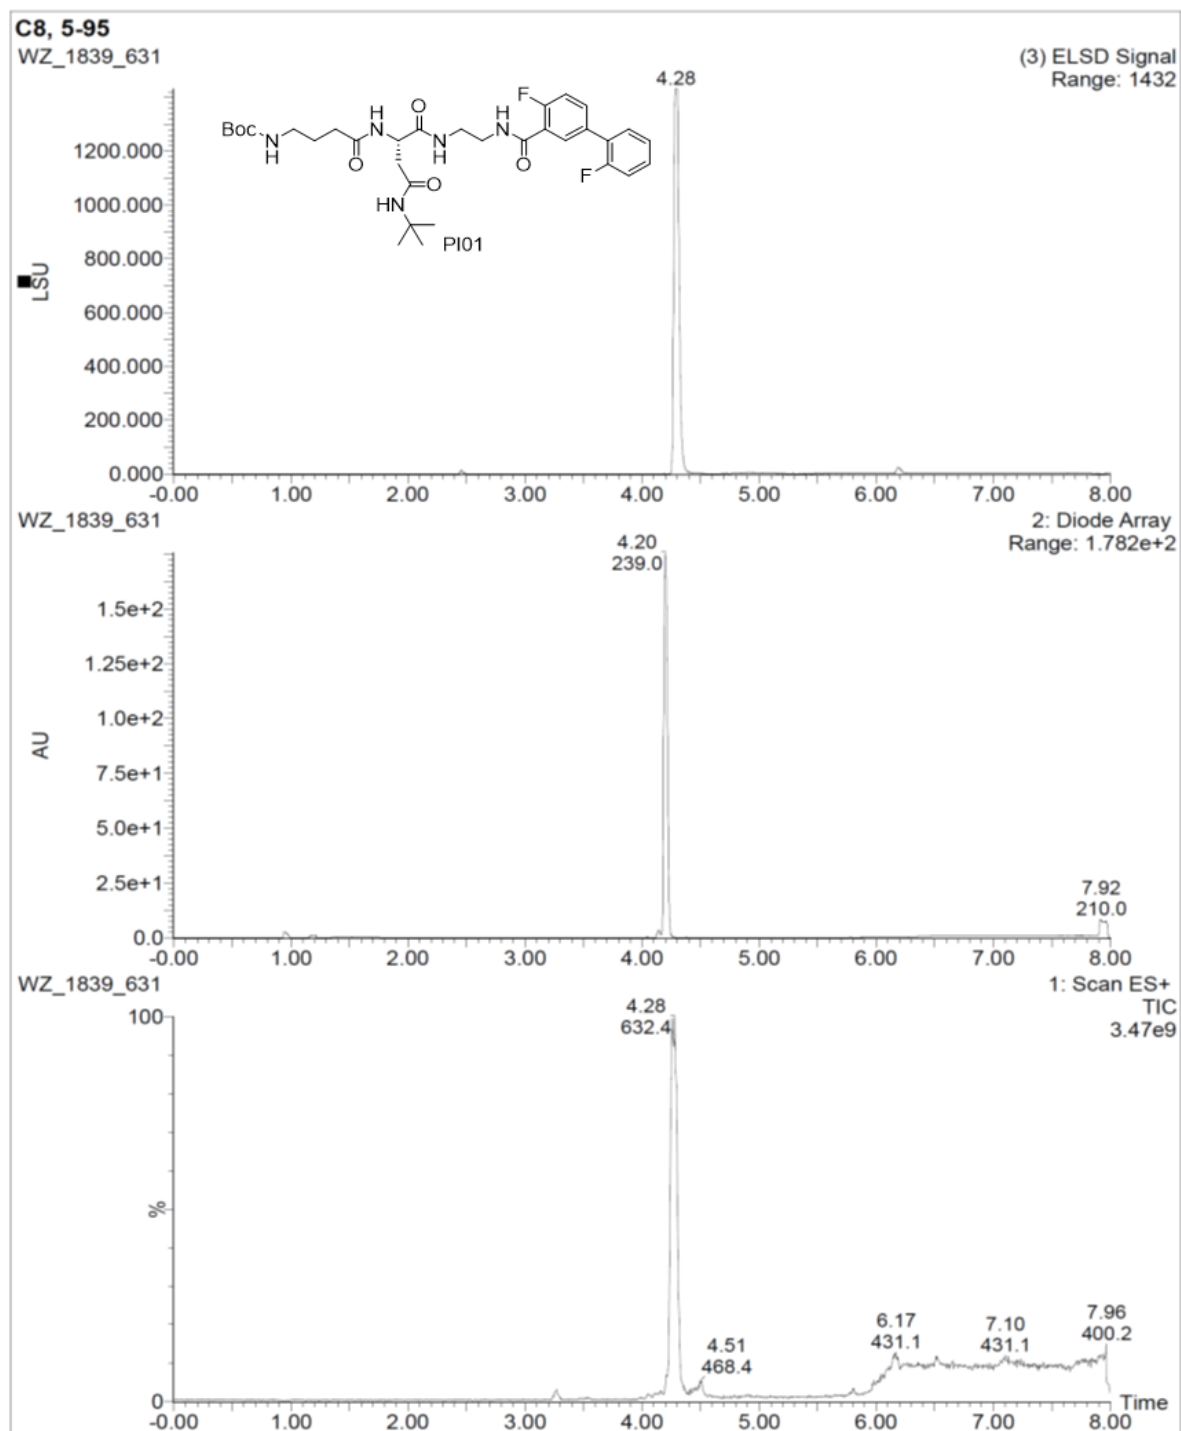

C8, 5-95

WZ\_1840\_325

(3) ELSD Signal  
Range: 1432

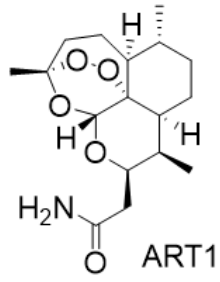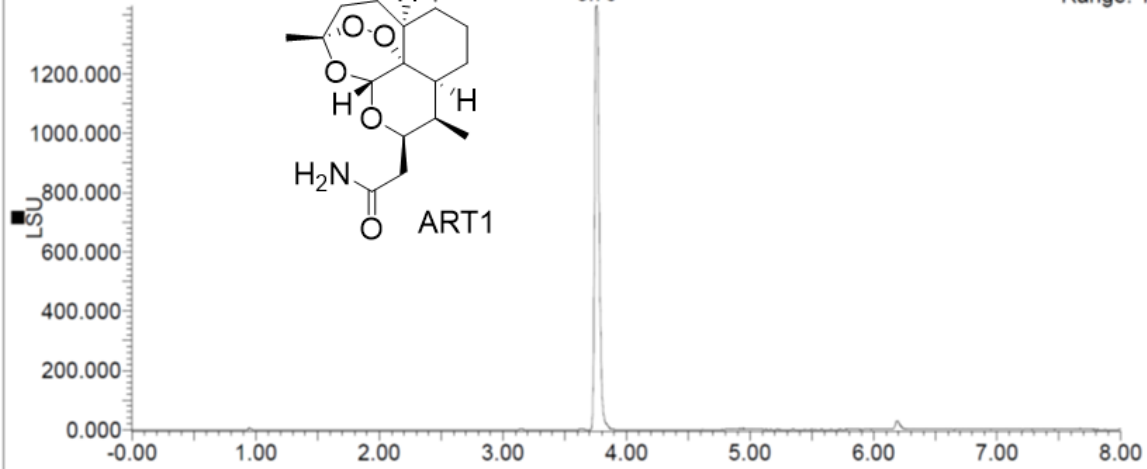

WZ\_1840\_325

2: Diode Array  
Range: 1.089e+1

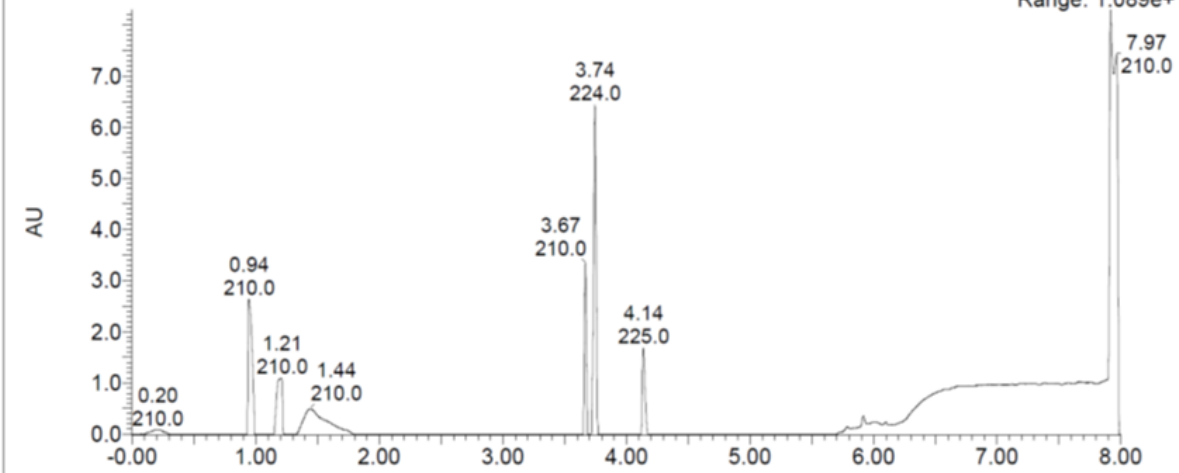

WZ\_1840\_325

1: Scan ES+  
TIC  
1.04e10

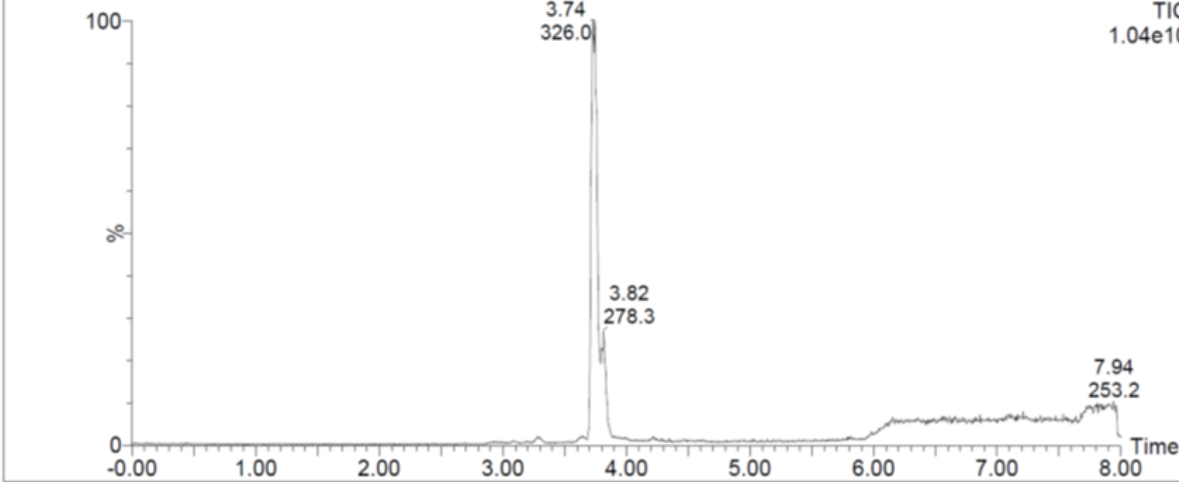

C8, 5-95

WZ\_hybrid2\_811\_02

(3) ELSD Signal  
Range: 1432

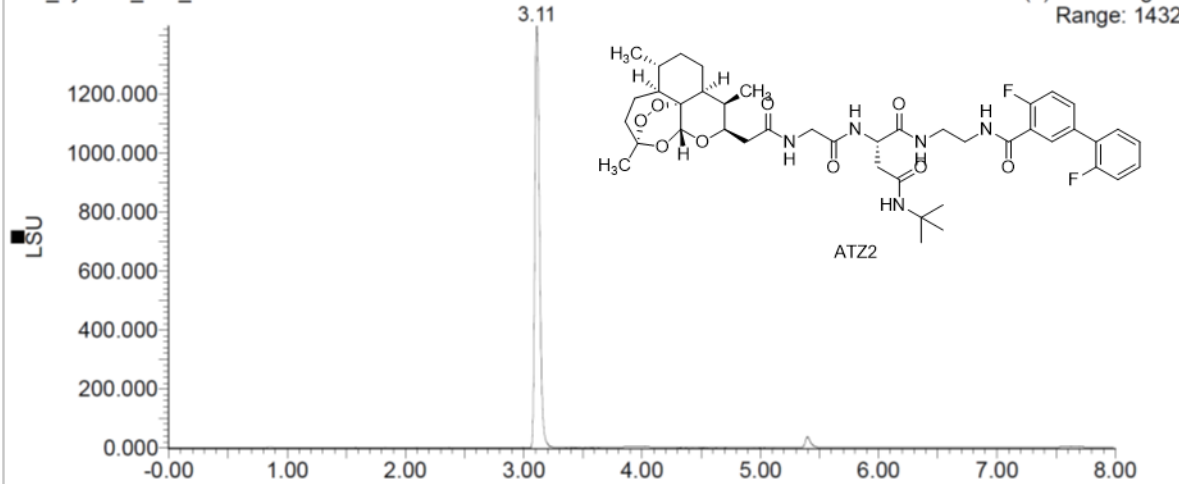

WZ\_hybrid2\_811\_02

2: Diode Array  
Range: 1.522e+2

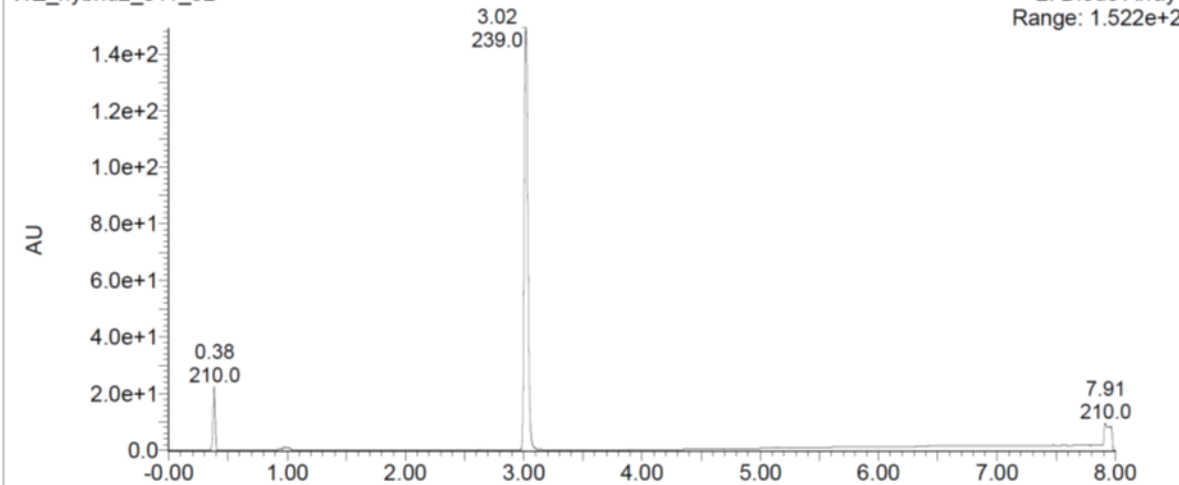

WZ\_hybrid2\_811\_02

1: Scan ES+  
TIC  
2.17e9

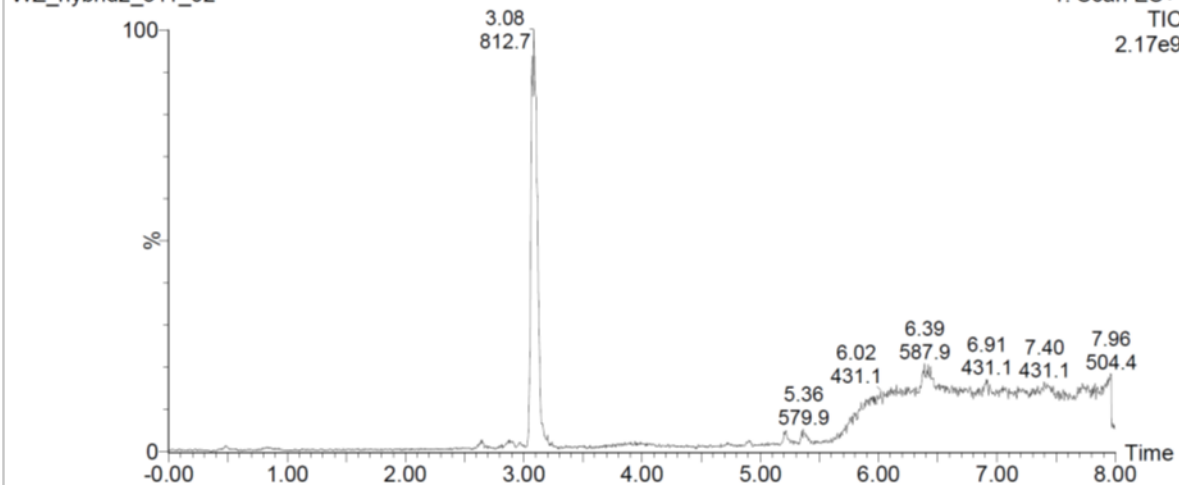

C8, 5-95

WZ\_hybrid4\_839\_03

(3) ELSD Signal  
Range: 259

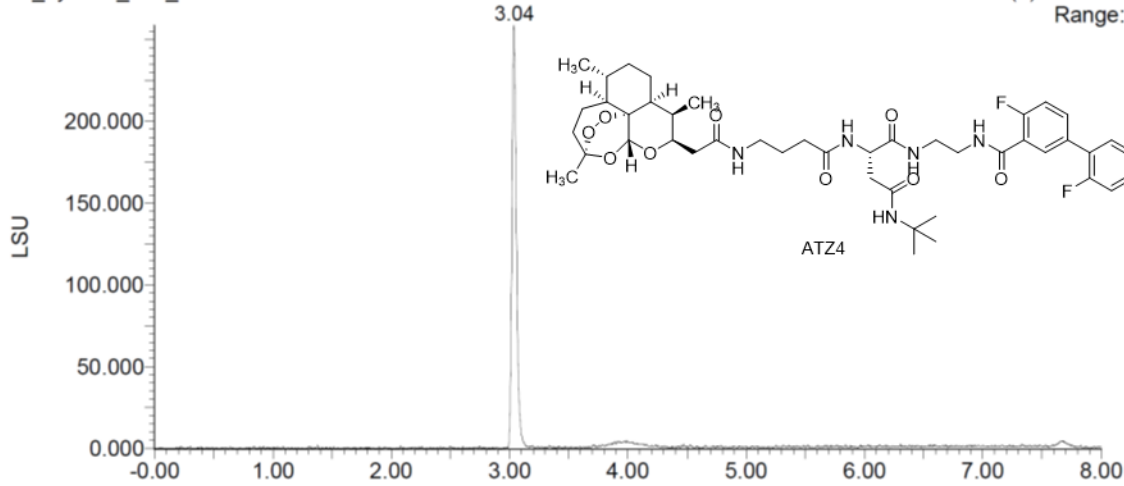

WZ\_hybrid4\_839\_03

2: Diode Array  
Range: 8.138e+1

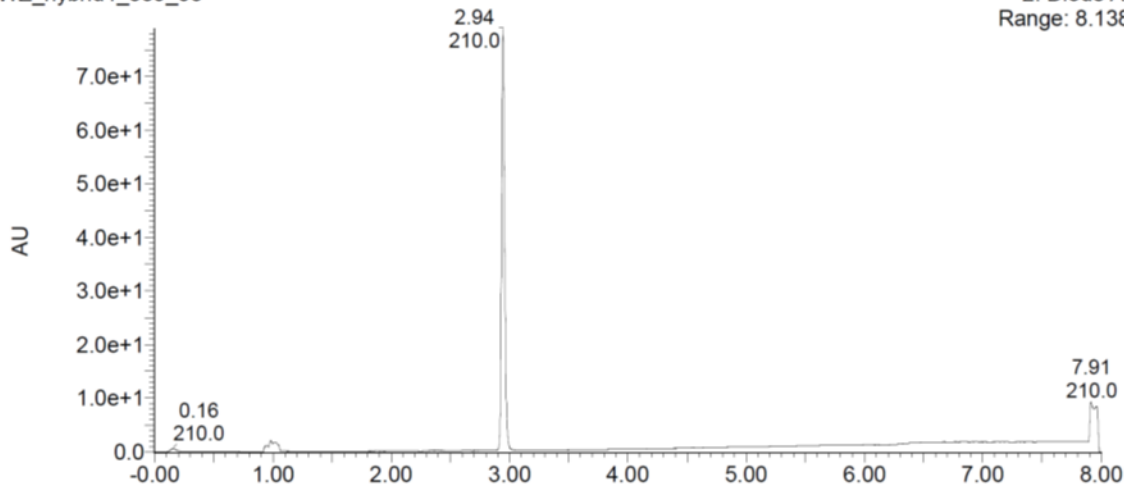

WZ\_hybrid4\_839\_03

1: Scan ES+  
TIC  
1.11e9

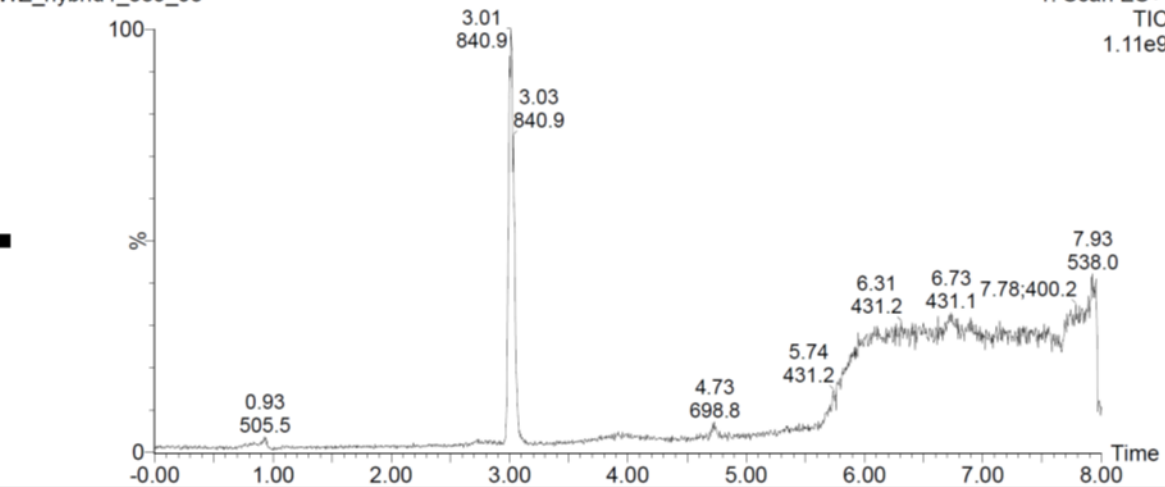

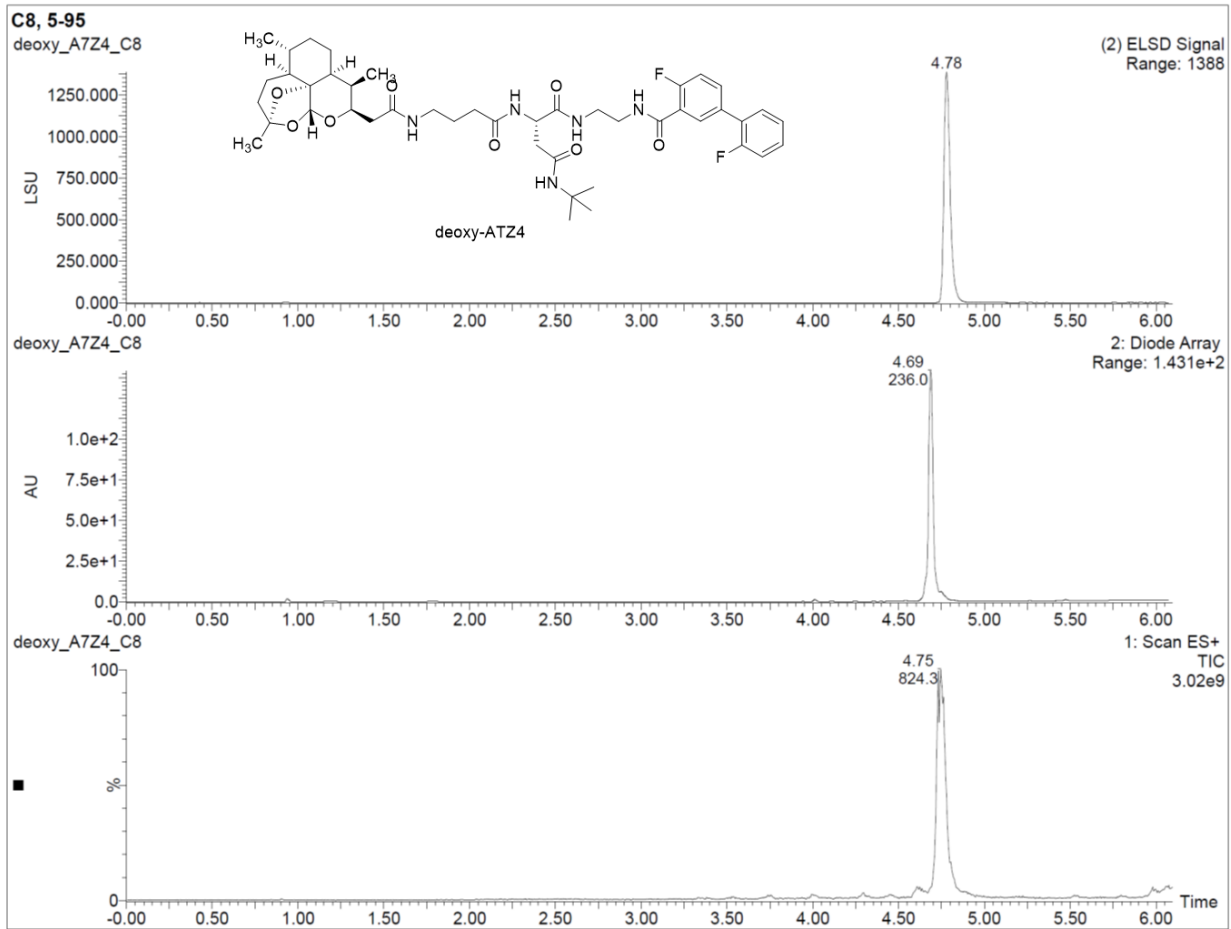

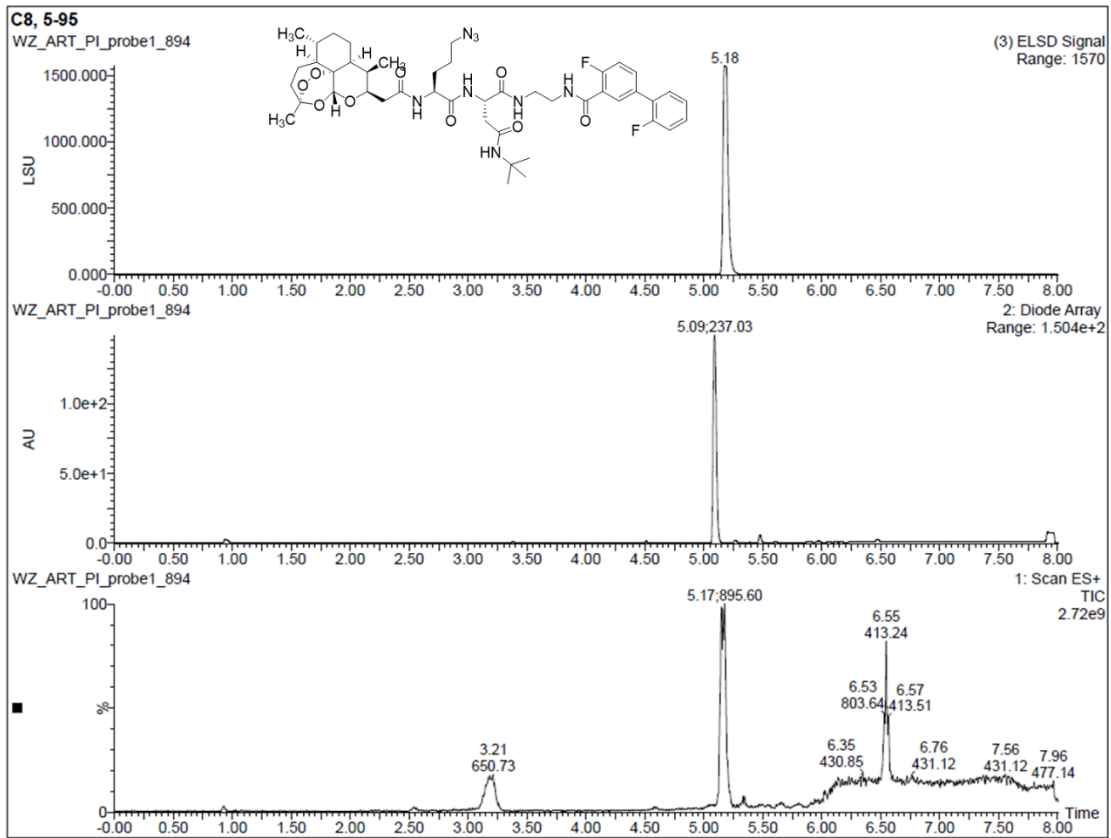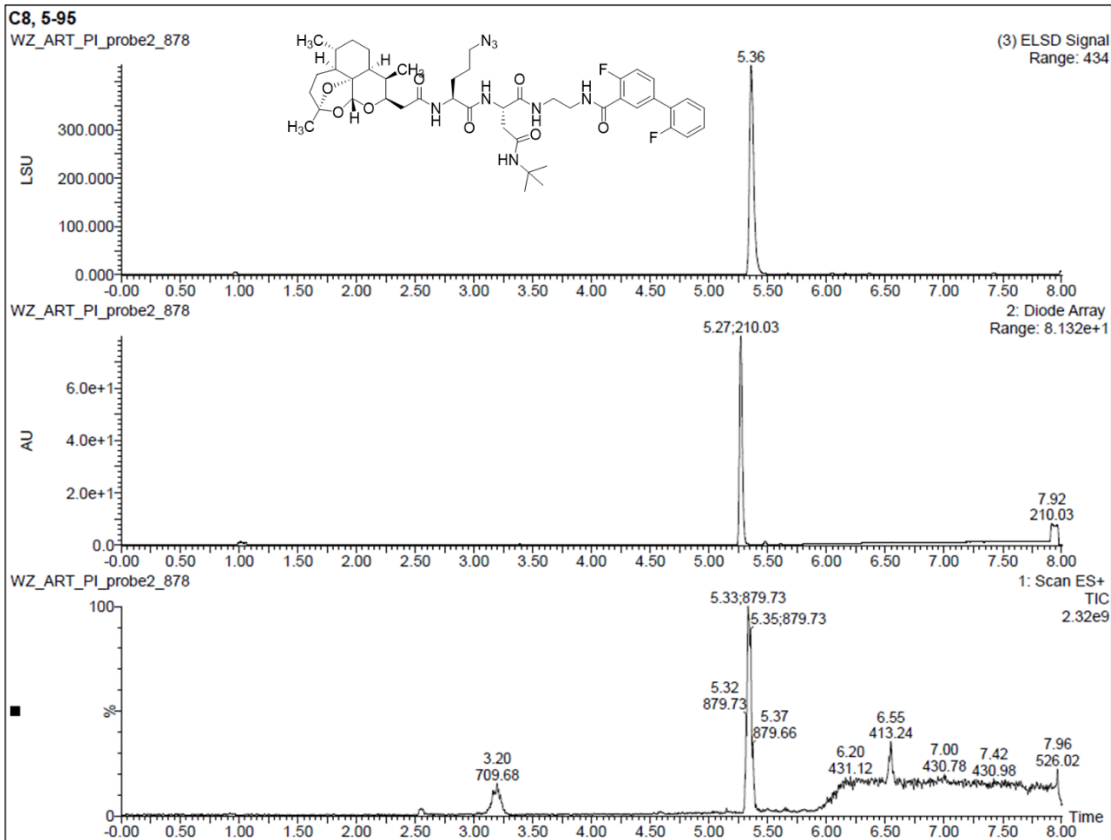

**HRMS:**



## HRMS of PI01

## Single Mass Analysis

Tolerance = 5.0 PPM / DBE: min = -1.5, max = 50.0

Element prediction: Off

Number of isotope peaks used for i-FIT = 3

Monoisotopic Mass, Even Electron Ions

243 formula(e) evaluated with 1 results within limits (up to 50 closest results for each mass)

Elements Used:

C: 0-32 H: 0-45 N: 0-5 O: 0-6 F: 0-2 Na: 0-1

Rong

Rong

C32H43F2N5O6

WZ\_18\_39 9 (0.208) Cm (9:16)

NMR Analytical Core Facility  
LCT Premier XE28-Sep-2018  
2:1:31: TOF MS ES+  
5.07e+005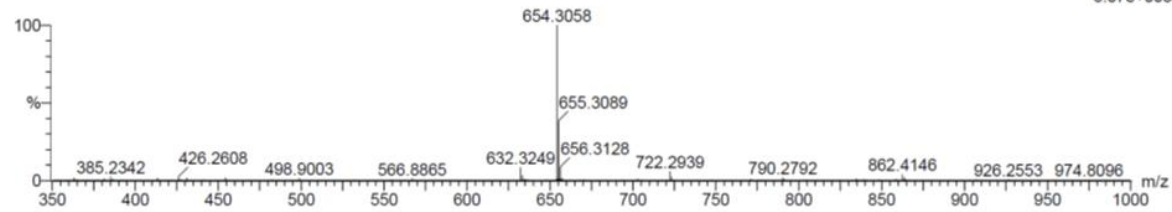

Minimum: -1.5  
Maximum: 5.0 5.0 50.0

| Mass     | Calc. Mass | mDa  | PPM  | DBE  | i-FIT | i-FIT (Norm) | Formula             |
|----------|------------|------|------|------|-------|--------------|---------------------|
| 654.3058 | 654.3079   | -2.1 | -3.2 | 12.5 | 520.8 | 0.0          | C32 H43 N5 O6 F2 Na |

## Elemental Composition Report

## HRMS of ART1

## Single Mass Analysis

Tolerance = 5.0 PPM / DBE: min = -1.5, max = 50.0

Element prediction: Off

Number of isotope peaks used for i-FIT = 3

Monoisotopic Mass, Even Electron Ions

32 formula(e) evaluated with 1 results within limits (up to 50 closest results for each mass)

Elements Used:

C: 0-17 H: 0-45 N: 0-1 O: 0-6 Na: 0-1

Rong

Rong

C17H27NO5

WZ\_18\_40 25 (0.570) Cm (25:31)

NMR Analytical Core Facility  
LCT Premier XE28-Sep-2018  
2:4:21: TOF MS ES+  
8.79e+004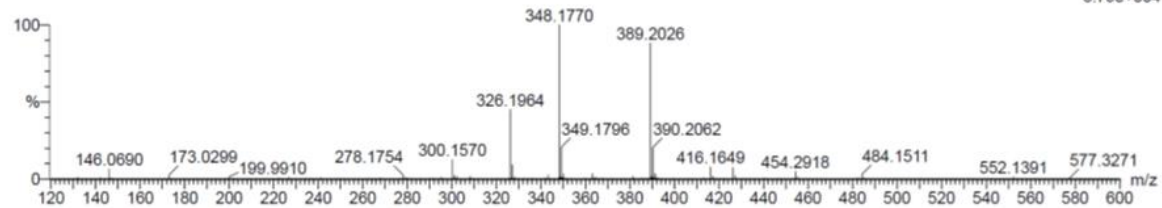

Minimum: -1.5  
Maximum: 5.0 5.0 50.0

| Mass     | Calc. Mass | mDa  | PPM  | DBE | i-FIT | i-FIT (Norm) | Formula         |
|----------|------------|------|------|-----|-------|--------------|-----------------|
| 348.1770 | 348.1787   | -1.7 | -4.9 | 4.5 | 545.8 | 0.0          | C17 H27 N O5 Na |

## Single Mass Analysis

Tolerance = 5.0 PPM / DBE: min = -1.5, max = 50.0

Element prediction: Off

Number of isotope peaks used for i-FIT = 3

Monoisotopic Mass, Even Electron Ions

347 formula(e) evaluated with 1 results within limits (up to 50 closest results for each mass)

Elements Used:

C: 0-42 H: 0-56 N: 0-5 O: 0-9 F: 0-2 Na: 0-1

Rong

NMR Analytical Core Facility

28-Sep-2018

Rong

LCT Premier XE

2::8:0

C42H55F2N5O9

WZ\_Hybrid2\_811 16 (0.350) Cm (11:16)

1: TOF MS ES+

1.49e+005

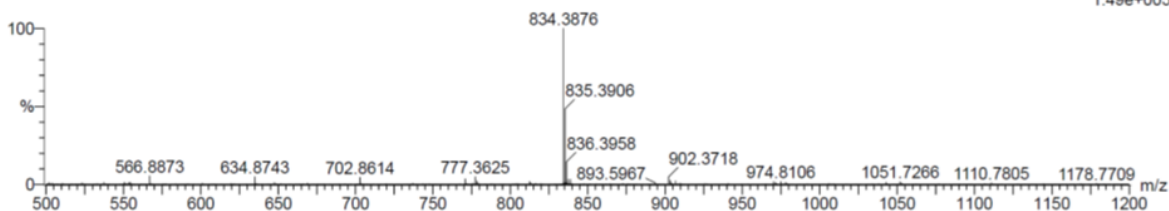

Minimum: -1.5  
Maximum: 5.0 5.0 50.0

| Mass     | Calc. Mass | mDa | PPM | DBE  | i-FIT | i-FIT (Norm) | Formula             |
|----------|------------|-----|-----|------|-------|--------------|---------------------|
| 834.3876 | 834.3866   | 1.0 | 1.2 | 16.5 | 370.2 | 0.0          | C42 H55 N5 O9 F2 Na |

## Elemental Composition Report

## HRMS of ATZ4

## Single Mass Analysis

Tolerance = 5.0 PPM / DBE: min = -1.5, max = 50.0

Element prediction: Off

Number of isotope peaks used for i-FIT = 3

Monoisotopic Mass, Even Electron Ions

347 formula(e) evaluated with 1 results within limits (up to 50 closest results for each mass)

Elements Used:

C: 0-44 H: 0-60 N: 0-5 O: 0-9 F: 0-2 Na: 0-1

Rong

NMR Analytical Core Facility

28-Sep-2018

Rong

LCT Premier XE

2::8:8

C44H59F2N5O9

WZ\_Hybrid4\_839 28 (0.622) Cm (28:33)

1: TOF MS ES+

9.78e+004

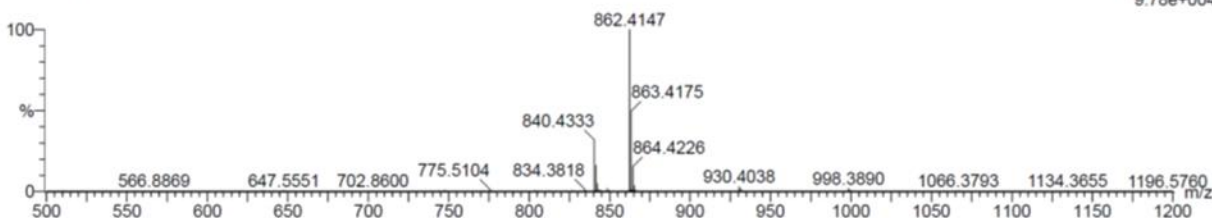

Minimum: -1.5  
Maximum: 5.0 5.0 50.0

| Mass     | Calc. Mass | mDa  | PPM  | DBE  | i-FIT | i-FIT (Norm) | Formula             |
|----------|------------|------|------|------|-------|--------------|---------------------|
| 862.4147 | 862.4179   | -3.2 | -3.7 | 16.5 | 327.2 | 0.0          | C44 H59 N5 O9 F2 Na |

## Single Mass Analysis

Tolerance = 5.0 PPM / DBE: min = -1.5, max = 50.0

Element prediction: Off

Number of isotope peaks used for i-FIT = 2

Monoisotopic Mass, Even Electron Ions

199 formula(e) evaluated with 1 results within limits (up to 50 closest results for each mass)

Elements Used:

C: 0-44 H: 0-60 N: 0-5 O: 0-8 F: 0-3

Gang  
Gang  
C44H59F2N5O8  
deoxy\_A7Z4 11 (0.244) Cm (9:11)

NMR Analytical Core Facility  
LCT Premier XE

17-Feb-2021  
3:8:2

1: TOF MS ES+  
2.97e+004

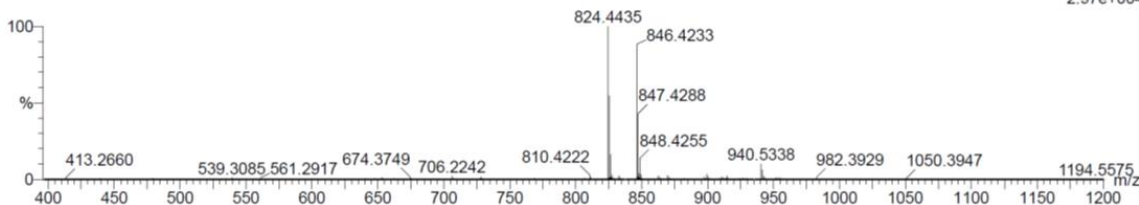

| Mass     | Calc. Mass | mDa | PPM | DBE  | i-FIT | i-FIT (Norm) | Formula          |
|----------|------------|-----|-----|------|-------|--------------|------------------|
| 824.4435 | 824.4410   | 2.5 | 3.0 | 16.5 | 138.2 | 0.0          | C44 H60 N5 O8 F2 |

## Single Mass Analysis

Tolerance = 5.0 PPM / DBE: min = -1.5, max = 50.0

Element prediction: Off

Number of isotope peaks used for i-FIT = 2

Monoisotopic Mass, Even Electron Ions

524 formula(e) evaluated with 1 results within limits (up to 50 closest results for each mass)

Elements Used:

C: 0-45 H: 0-61 N: 0-8 O: 0-9 F: 0-2 Na: 0-1

Gang  
Wenfu  
C45H60F2N8O9  
WZ\_ART\_PI\_probe1\_894 63 (1.420) Cm (62:66)

NMR Analytical Core Facility  
LCT Premier XE

15-Apr-2019  
11:59:18

1: TOF MS ES+  
2.23e+005

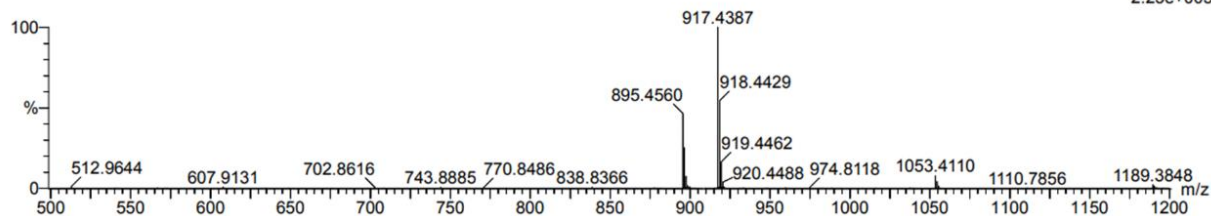

| Mass     | Calc. Mass | mDa | PPM | DBE  | i-FIT | i-FIT (Norm) | Formula             |
|----------|------------|-----|-----|------|-------|--------------|---------------------|
| 917.4387 | 917.4349   | 3.8 | 4.1 | 18.5 | 190.6 | 0.0          | C45 H60 N8 O9 F2 Na |

### Single Mass Analysis

Tolerance = 5.0 PPM / DBE: min = -1.5, max = 50.0

Element prediction: Off

Number of isotope peaks used for i-FIT = 2

### HRMS of Deoxy-ATZ-P1

Monoisotopic Mass, Even Electron Ions

510 formula(e) evaluated with 1 results within limits (up to 50 closest results for each mass)

Elements Used:

C: 0-45 H: 0-61 N: 0-8 O: 0-9 F: 0-2 Na: 0-1

Gang

Wenfu

C45H60F2N8O8

WZ\_ART\_PI\_probe2\_878 35 (0.786) Cm (30:35)

NMR Analytical Core Facility  
LCT Premier XE

15-Apr-2019  
12:05:09

1: TOF MS ES+  
1.52e+005

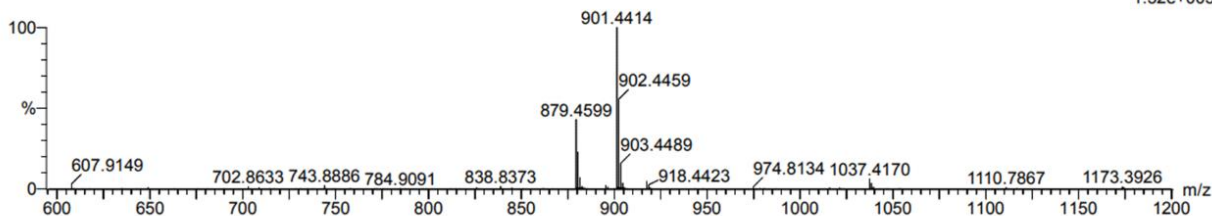

Minimum:

Maximum: 5.0 5.0 -1.5

| Mass | Calc. Mass | mDa | PPM | DBE | i-FIT | i-FIT (Norm) | Formula |
|------|------------|-----|-----|-----|-------|--------------|---------|
|------|------------|-----|-----|-----|-------|--------------|---------|

|          |          |     |     |      |       |     |                     |
|----------|----------|-----|-----|------|-------|-----|---------------------|
| 901.4414 | 901.4400 | 1.4 | 1.6 | 18.5 | 195.3 | 0.0 | C45 H60 N8 O8 F2 Na |
|----------|----------|-----|-----|------|-------|-----|---------------------|

**Extended Raw Data**

a. Extended data for Figure 2. Triplicate  $\beta$ -casein degradation with dialysis.

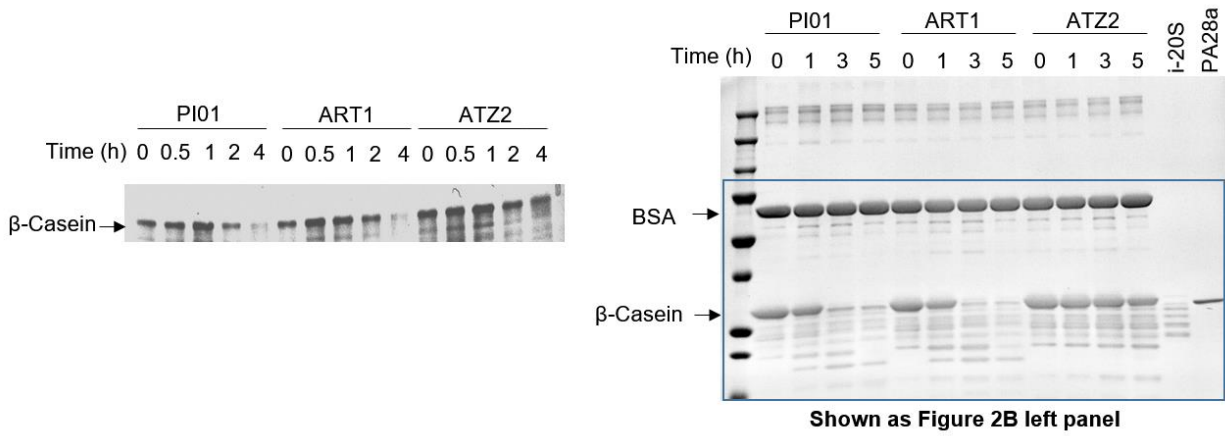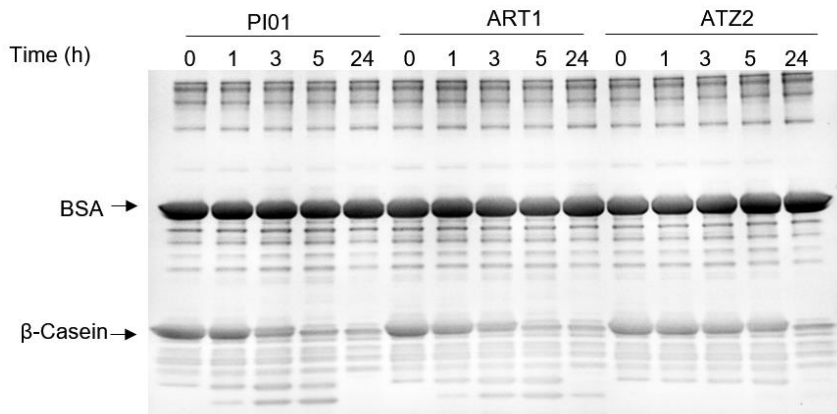

b. Extended data for Figure 2. Duplicate  $\beta$ -casein degradation without dialysis

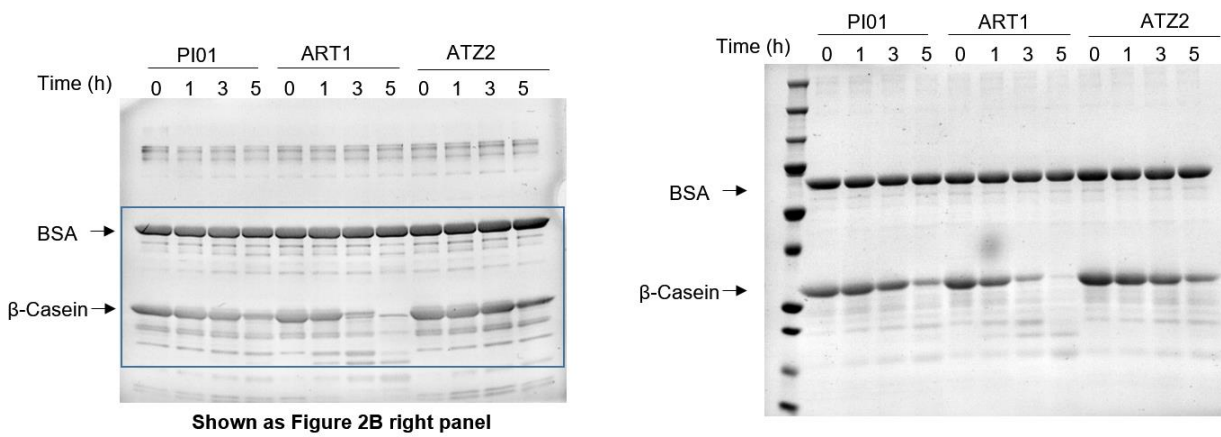

c. Extended Data for Figure S2



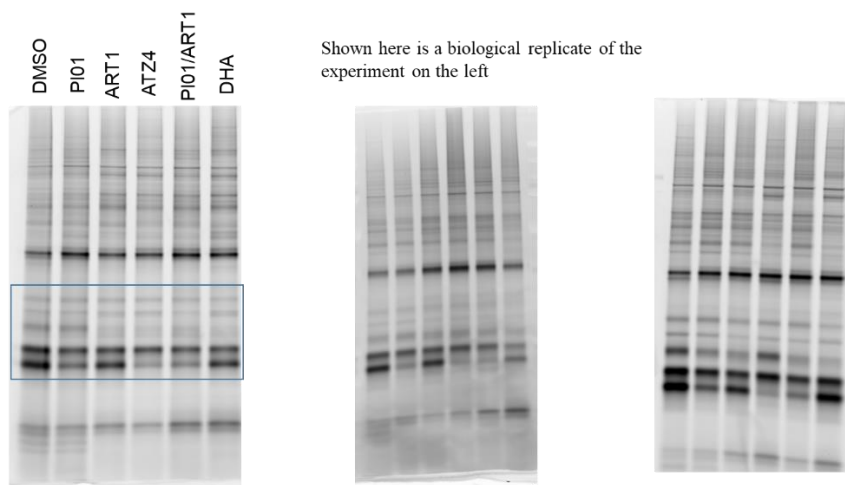

d. Extended Data for Figure 4 (switched samples indicated by red arrow were recorded in notebook)

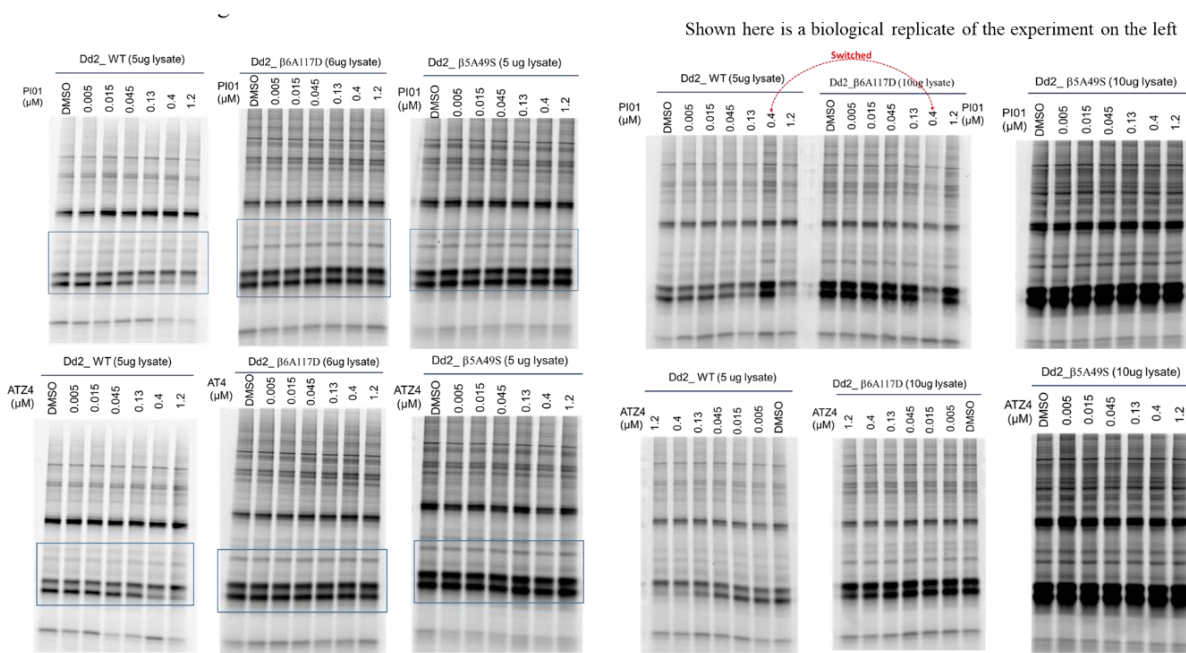

e. Extended data for Figure 5B. Repeat of ATZ-P1 labeling experiment.

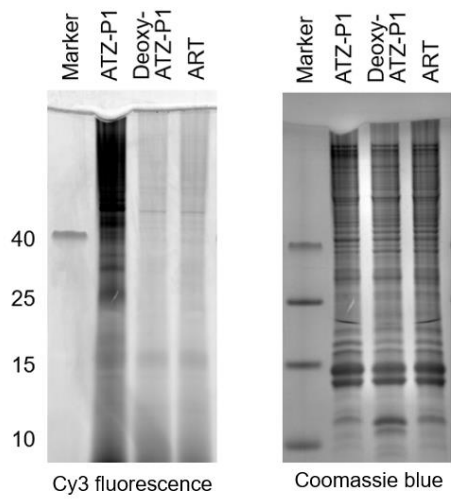

f. Extended data for Figure 5D. Triplicate experiments.

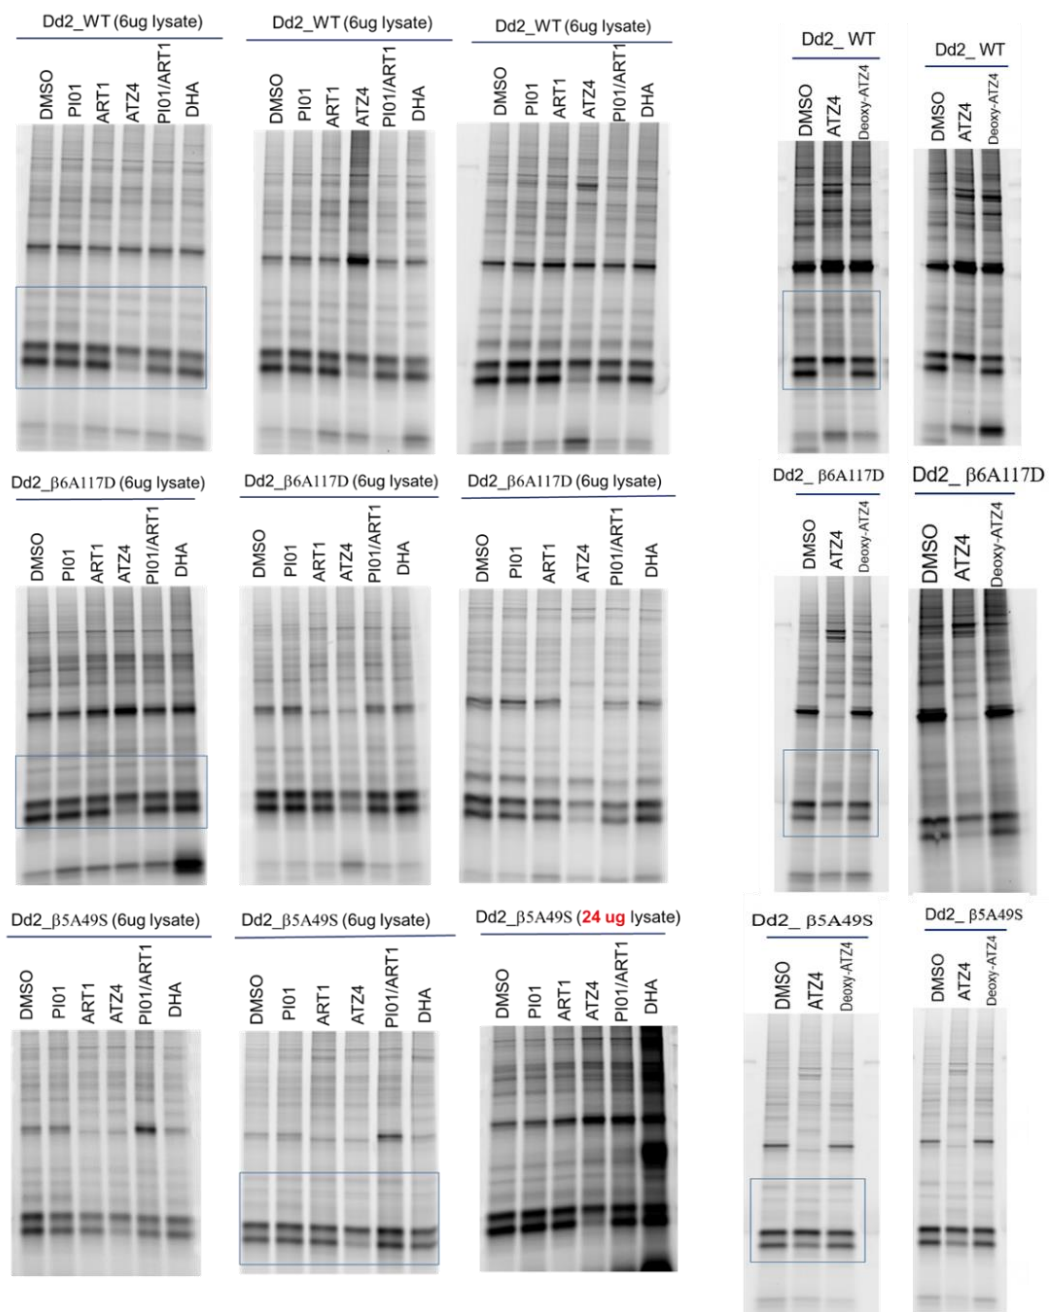

Supplement: NIHMS1899562-supplement-MMC2.pdf [file NIHMS1899562-supplement-MMC2.pdf]
