# Supplementary material
Source: PubMed Central journal article supplement (PMC10240386)
Supplement: NIHMS1899562-supplement-MMC1.pdf [file NIHMS1899562-supplement-MMC1.pdf]

**Supplemental information**

**Dual-pharmacophore artemisinins hijack the  
*Plasmodium* ubiquitin-proteasome system to kill  
malaria parasites while overcoming drug resistance**

**Wenhu Zhan, Daqiang Li, Shubha Bevkal Subramanyaswamy, Yi Jing Liu, Changmei Yang, Hao Zhang, Jacob C. Harris, Rong Wang, Songbiao Zhu, Hedy Rocha, Julian Sherman, Junling Qin, Mikayla Herring, Nelson V. Simwela, Andrew P. Waters, George Sukenick, Liwang Cui, Ana Rodriguez, Haiteng Deng, Carl F. Nathan, Laura A. Kirkman, and Gang Lin**

**Dual-pharmacophore artemisins hijack the *Plasmodium* ubiquitin-proteasome system to kill malaria parasites and overcome resistance**

Wenhu Zhan,<sup>1,8,9</sup> Daqiang Li,<sup>1,9</sup> Shubha Bevkal Subramanyaswamy,<sup>2</sup> Yi Jing Liu,<sup>2</sup> Changmei Yang,<sup>3</sup> Hao Zhang,<sup>1</sup> Jacob C. Harris,<sup>2</sup> Rong Wang,<sup>4</sup> Songbiao Zhu,<sup>3</sup> Hedy Rocha,<sup>5</sup> Julian Sherman,<sup>5</sup> Junling Qin,<sup>6</sup> Nelson V. Simwela,<sup>7</sup> Andrew P. Waters,<sup>7</sup> George Sukenick,<sup>4</sup> Liwang Cui,<sup>6</sup> Ana Rodriguez,<sup>5</sup> Haiteng Deng,<sup>3</sup> Carl F. Nathan,<sup>1</sup> Laura A. Kirkman,<sup>1,2\*</sup> Gang Lin<sup>1,10\*</sup>

<sup>1</sup>Department of Microbiology & Immunology, Weill Cornell Medicine, 1300 York Avenue, New York, NY 10065; <sup>2</sup>Department of Medicine, Division of Infectious Diseases, 1300 York Avenue, New York, NY 10065; <sup>3</sup>MOE Key Laboratory of Bioinformatics, Center for Synthetic and Systematic Biology, School of Life Sciences, Tsinghua University, Beijing 100084, China; <sup>4</sup>NMR Analytical Core Facility, Memorial Sloan Kettering Cancer Center, New York, NY 10065; <sup>5</sup>Division of Parasitology, Department of Microbiology, New York University School of Medicine, New York, NY, USA. <sup>6</sup> Department of Internal Medicine, Morsani College of Medicine, University of South Florida, Tampa, Florida, USA; <sup>7</sup>School of Infection & Immunity, Wellcome Centre for Integrative Parasitology, University of Glasgow, Glasgow, United Kingdom.

<sup>8</sup>Present address: iCarbonX (Shenzhen) Co., Ltd., Shenzhen, 518000, China

<sup>9</sup>These authors contributed equally

<sup>10</sup>Lead contact

\*Corresponding authors: gal2005@med.cornell.edu; lak9015@med.cornell.edu

**Table of Contents**

**S3 – Supplementary Schemes and Figure**

**S9 – Supplementary Tables**

**S11 –  $^1\text{H}$  and  $^{13}\text{C}$  NMR Spectra**

**S22 – LCMS**

**S28 – HRMS**

**S32 – Extended Raw Data**

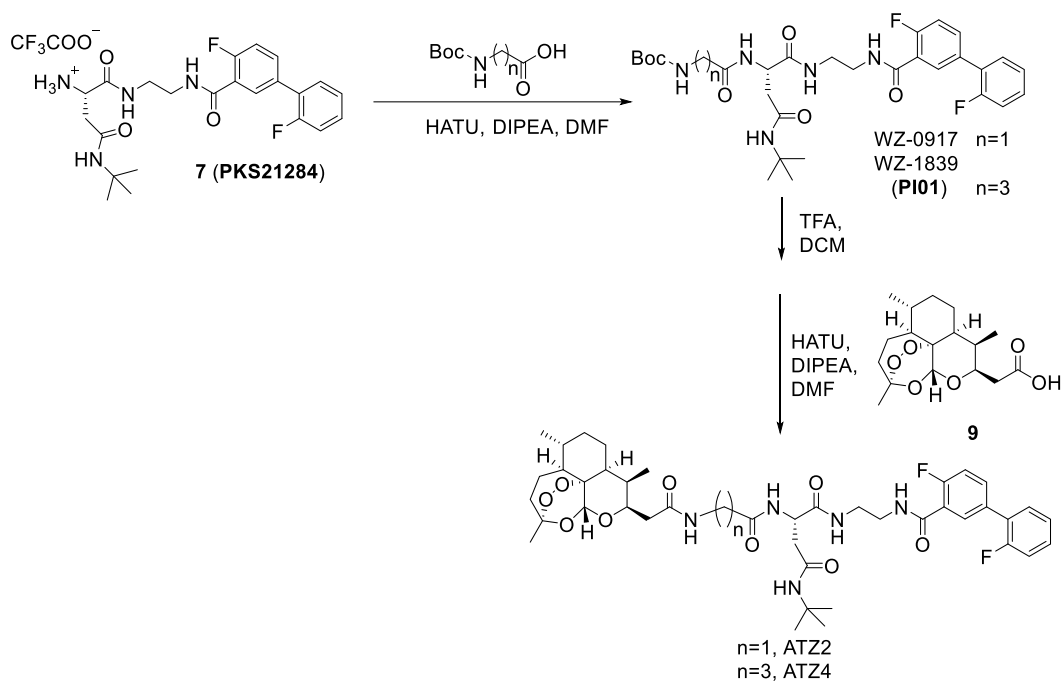

**Scheme S1.** Synthetic route of ART-based hybrids ATZ2 and ATZ4. Related to Figure 1A.

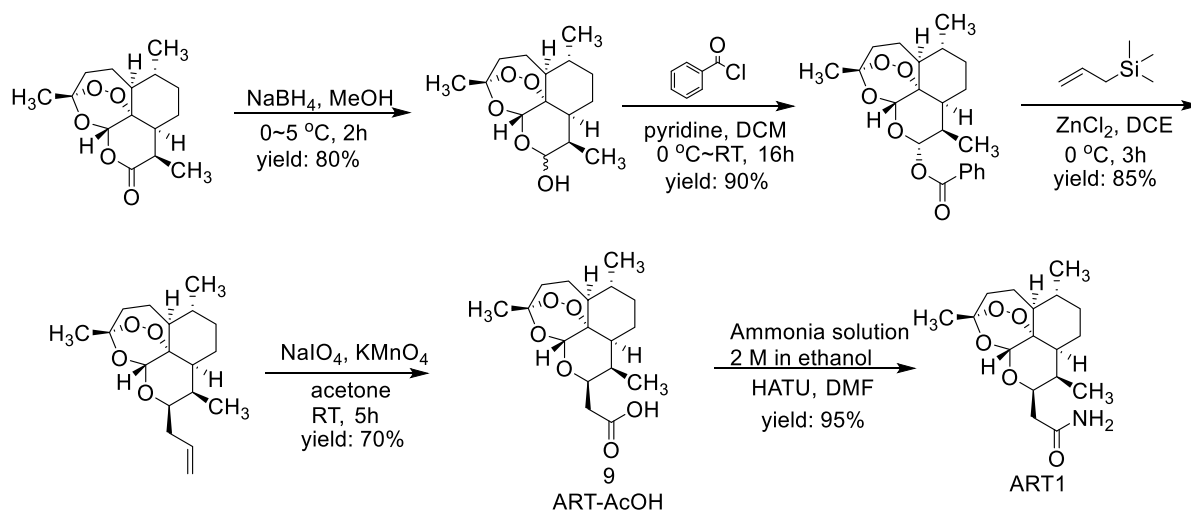

**Scheme S2.** Synthetic route of ART-AcOH (9) and ART1. Related to Figure 1A.

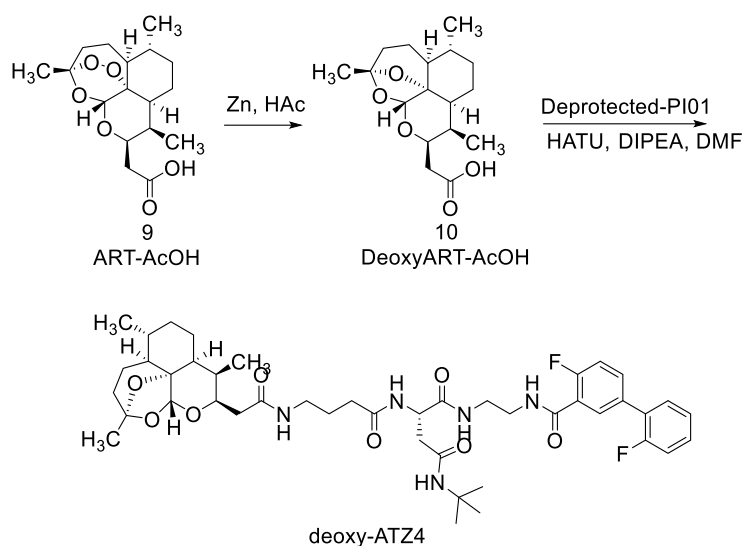

**Scheme S3.** Synthesis of deoxy-ATZ4. Related to Figure 1A.

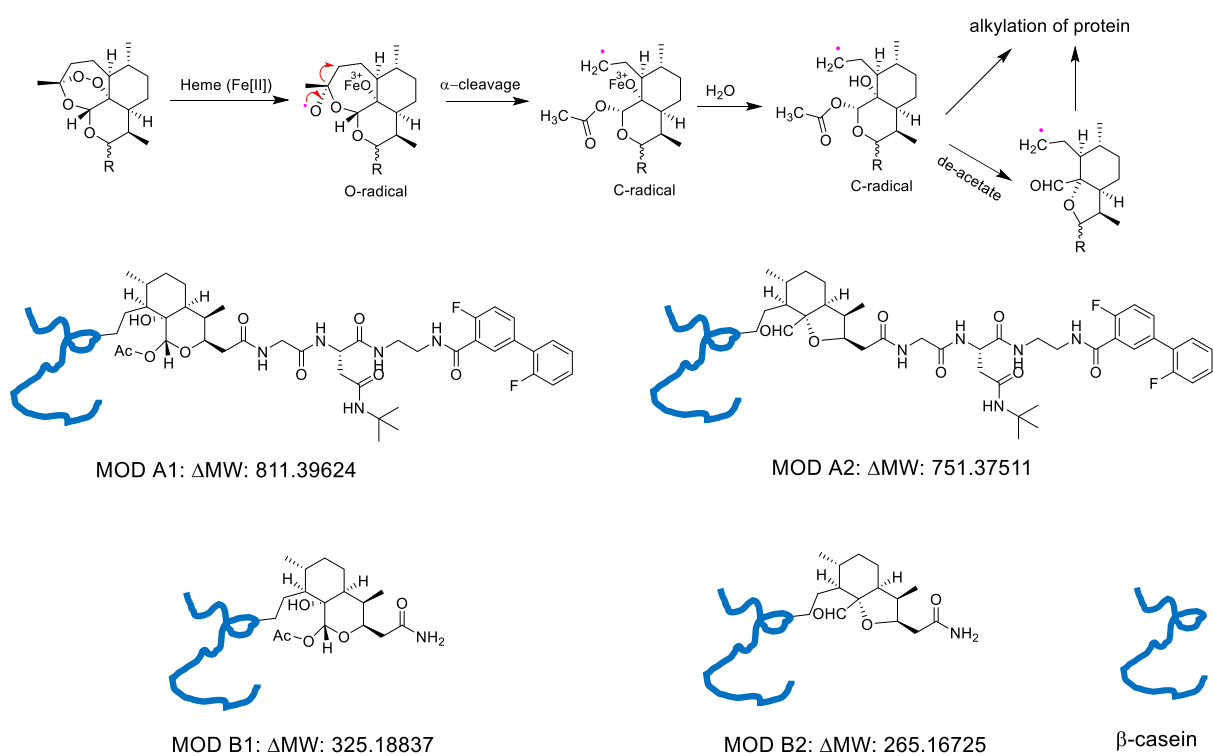

**Scheme S4.** Heme-induced activation of the endoperoxides, yielding reactive radical intermediates of ART1 and ATZ2 capable of two types of covalent modification of  $\beta$ -casein. Related to Figure 2.

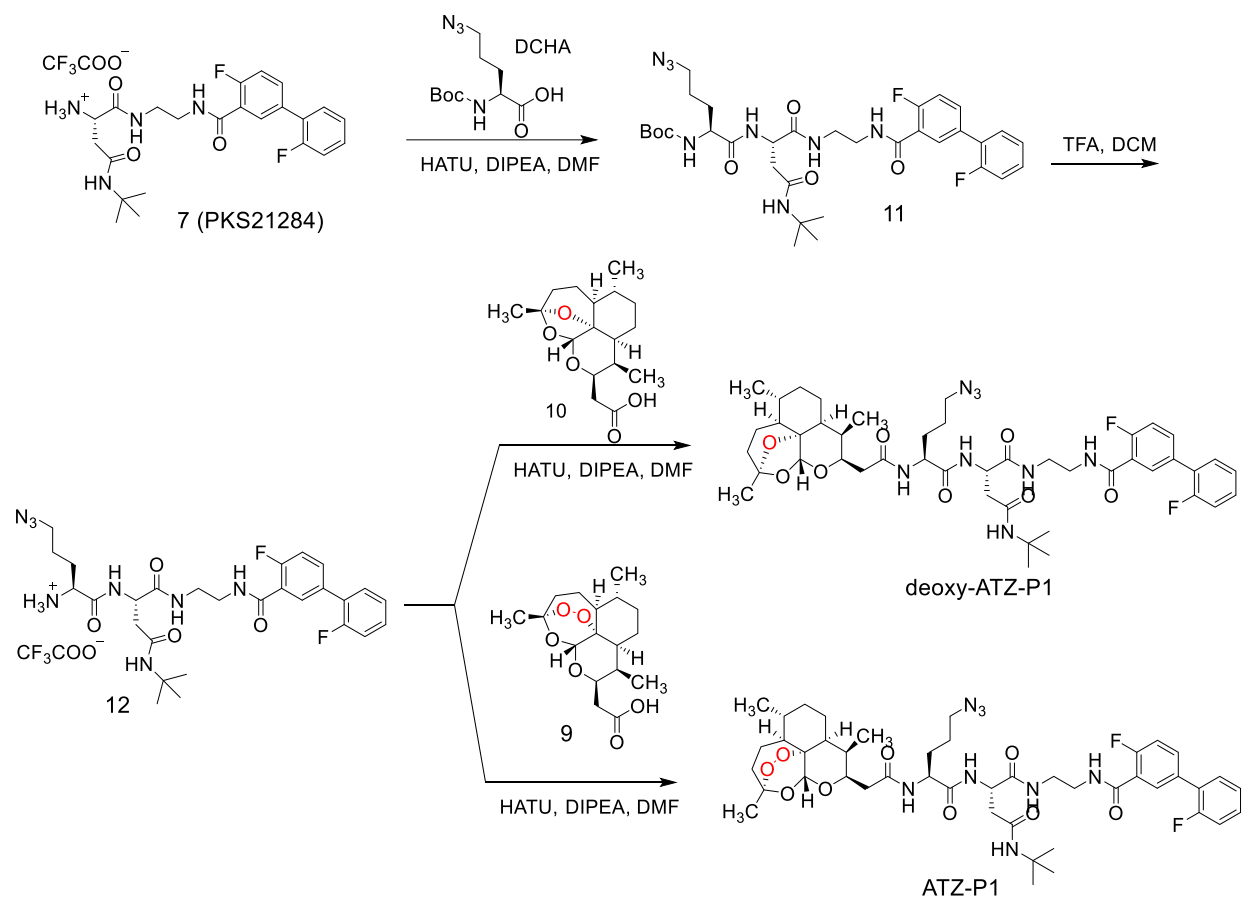

**Scheme S5.** Synthesis of ATZ-P1 and deoxy-ATZ-P1. Related to Figure 5A.

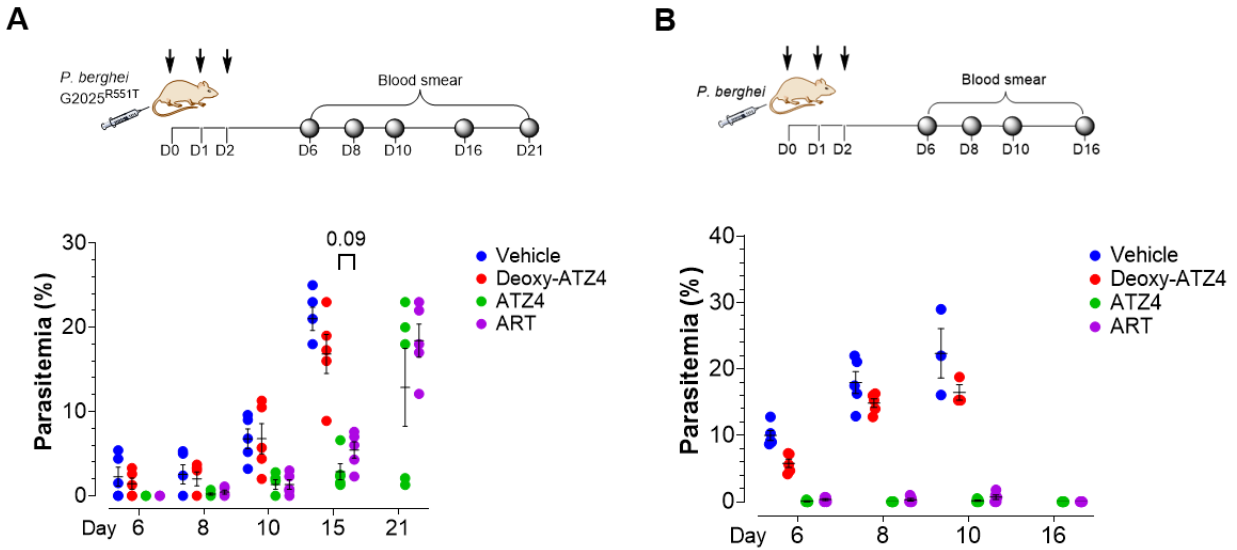

**Figure S1. In vivo efficacy of ATZ4 in mouse models of recrudescence and *Pb* infection.** (A) Second recrudescence experiment. Mice infected with *Pb* ART resistant K13<sup>R551T</sup> mutant were treated with vehicle, ART (50 mg/kg), ATZ4 (120 mg/kg) and deoxy-ATZ4 (120 mg/kg for 1st experiment and 120 mg/kg for 2nd experiment) administered via i.p. 3 hours post inoculation of parasites on day 0 and continued on day 1 and day 2 (shown by arrows). Parasitemia in each mouse was monitored by microscopic analysis of Giemsa-stained blood smears on day 6, 8, 10., 16 and 21. The rates of recrudescence in each cohort on the indicated days were plotted as the percentages of mice with a positive smear. (B) In vivo efficacy of ATZ4 in mice infected with *Pb* wild type, in comparison with vehicle, deoxy-ATZ4, and ART. Related to Figure 1D.

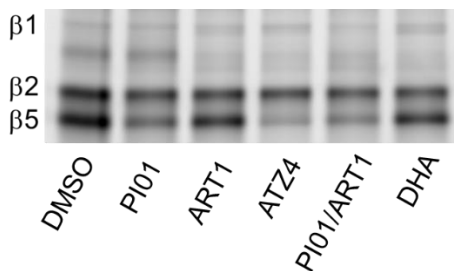

**Figure S2.** Labelling inhibition of *Pf*20S in Dd2 parasites treated with DMSO, PI01, ART1, ATZ4, PI01/ART1 (1:1) or DHA, assessed by their ability to block labeling of the parasites' proteasomes by MV151. Parasites were treated with indicated compounds for 6 hours and extracellular compounds were removed prior to hypotonic lysis of red blood cells. Related to Figure 5C-D.

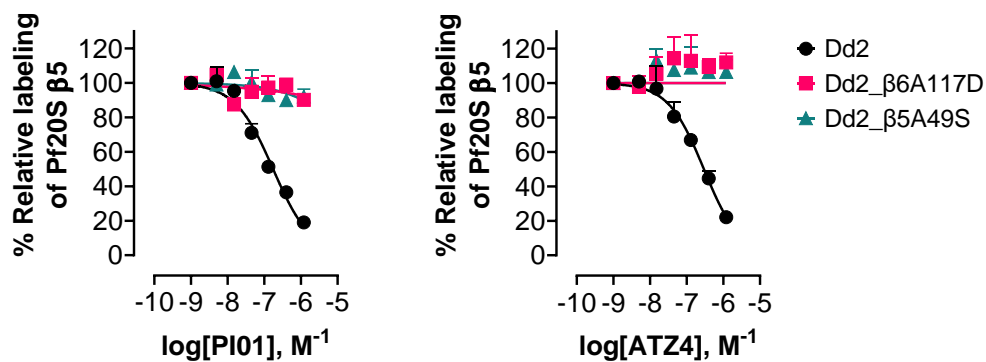

Figure S3. Inhibition of labeling of the Pf20S β5 by PI01 and ATZ4 in lysates of Dd2, Dd2β6<sup>A117D</sup>, and Dd2β5<sup>A49S</sup>. Densitometry analyses of the β5 bands in Figure 4 and extended raw data **d**. were done with ImageJ. Related to Figure 4 and extended raw data **d**.



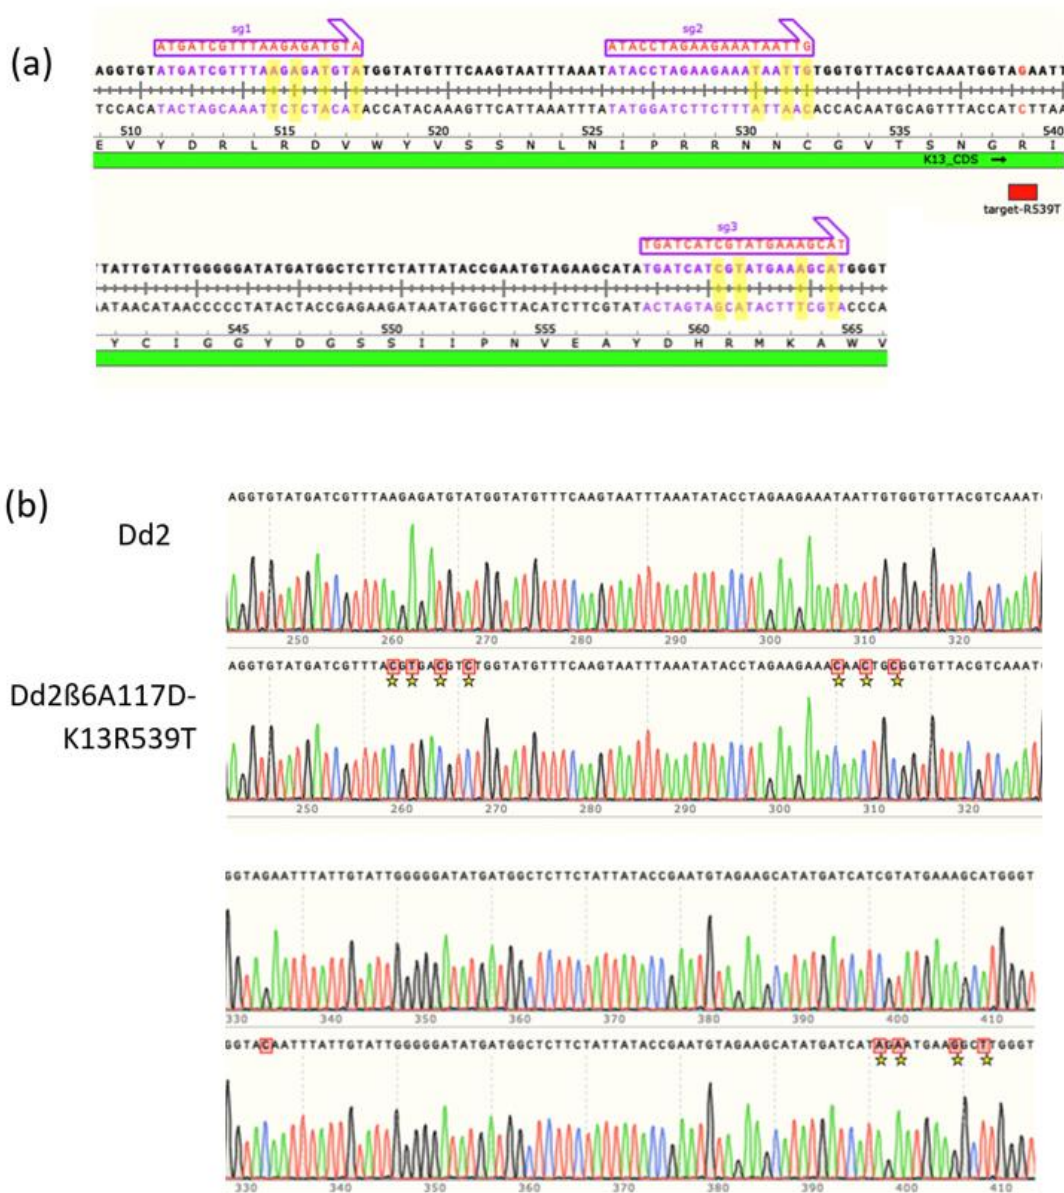

**Figure S4. sgRNA:Cas9 mediated single nucleotide replacement in K13 gene to generate K13R539T mutation in Dd2β6A117D cell line.** (a) K13 locus showing the target 20-nucleotide guide sequence (purple) recognized by sgRNA:Cas9. In order to have a robust Cas9 editing, three different single guides were selected (sg1, 2 and 3). To prevent cleavage of the modified locus by Cas9, shield mutations (highlighted in yellow) were incorporated into the repair template. Target single nucleotide replacement to achieve R539T is highlighted in red. (b) Chromatogram of the modified locus in Dd2β6A117D showing the desired mutation and shield mutations (yellow stars). Dd2 sequence serves as a non-edited gene sequence control. Related to Figure 6A.

**Table S1.** Two types of modification of  $\beta$ -casein by ATZ2 or ART1 as shown in **Scheme S6**. (A) For ATZ2, MOD A<sub>1</sub>  $\Delta$ mass = 811.39624 and MOD A<sub>2</sub>  $\Delta$ mass = 751.37511 (A<sub>1</sub>-acetate); (B) For ART1, MOD B<sub>1</sub>  $\Delta$ mass = 325.18837 and MOD B<sub>2</sub>  $\Delta$ mass = 265.16725 (B<sub>1</sub>-acetate). Related to Figure 2C-D.

| Tagged molecules | Modification       | Molecular formula                                                            | Theoretical mass (monoisotopic) |
|------------------|--------------------|------------------------------------------------------------------------------|---------------------------------|
| ATZ2             | MOD A <sub>1</sub> | C <sub>42</sub> H <sub>55</sub> F <sub>2</sub> N <sub>5</sub> O <sub>9</sub> | 811.39624                       |
|                  | MOD A <sub>2</sub> | C <sub>40</sub> H <sub>51</sub> F <sub>2</sub> N <sub>5</sub> O <sub>7</sub> | 751.37511                       |
| ART1             | MOD B <sub>1</sub> | C <sub>17</sub> H <sub>27</sub> NO <sub>5</sub>                              | 325.18837                       |
|                  | MOD B <sub>2</sub> | C <sub>15</sub> H <sub>23</sub> NO <sub>3</sub>                              | 265.16725                       |

**Table S2.** Fragment ions of peptide (SLVYFPFGP<sup>80</sup>) modified by ATZ2. Red and blue numbers indicate fragments that were matched with theoretical masses of corresponding fragments; black numbers indicate fragments not detected. Related to Figure 2C-D.

| #1 | b <sup>+</sup> | b <sup>2+</sup> | Seq.   | y <sup>+</sup> | y <sup>2+</sup> | #2 |
|----|----------------|-----------------|--------|----------------|-----------------|----|
| 1  | 88.03931       | 44.52329        | S      |                |                 | 9  |
| 2  | 201.12338      | 101.05533       | L      | 1700.87809     | 850.94268       | 8  |
| 3  | 300.19180      | 150.59954       | V      | 1587.79402     | 794.40065       | 7  |
| 4  | 463.25512      | 232.13120       | Y      | 1488.72560     | 744.86644       | 6  |
| 5  | 560.30789      | 280.65758       | P      | 1325.66228     | 663.33478       | 5  |
| 6  | 707.37631      | 354.19179       | F      | 1228.60951     | 614.80839       | 4  |
| 7  | 804.42908      | 402.71818       | P      | 1081.54109     | 541.27418       | 3  |
| 8  | 861.45055      | 431.22891       | G      | 984.48832      | 492.74780       | 2  |
| 9  |                |                 | P-ATZ2 | 927.46685      | 464.23706       | 1  |

**Table S3.** Fragment ions of peptide (F<sup>67</sup>AQTQSLVYFPFGPIPN) modified by ART1. Red and blue numbers indicate fragments that were matched with theoretical masses of corresponding fragments; black numbers indicate fragments not detected. Related to Figure 2C-D.

| #1 | b <sup>+</sup> | b <sup>2+</sup> | Seq.   | y <sup>+</sup> | y <sup>2+</sup> | #2 |
|----|----------------|-----------------|--------|----------------|-----------------|----|
| 1  | 473.26407      | 237.13567       | F-ART1 |                |                 | 17 |
| 2  | 544.30119      | 272.65423       | A      | 1728.89561     | 864.95144       | 16 |
| 3  | 672.35977      | 336.68352       | Q      | 1657.85849     | 829.43288       | 15 |
| 4  | 773.40745      | 387.20736       | T      | 1529.79991     | 765.40359       | 14 |
| 5  | 901.46603      | 451.23665       | Q      | 1428.75223     | 714.87975       | 13 |

|    |            |            |   |            |           |    |
|----|------------|------------|---|------------|-----------|----|
| 6  | 988.49806  | 494.75267  | S | 1300.69365 | 650.85046 | 12 |
| 7  | 1101.58213 | 551.29470  | L | 1213.66162 | 607.33445 | 11 |
| 8  | 1200.65055 | 600.82891  | V | 1100.57755 | 550.79241 | 10 |
| 9  | 1363.71387 | 682.36057  | Y | 1001.50913 | 501.25820 | 9  |
| 10 | 1460.76664 | 730.88696  | P | 838.44581  | 419.72654 | 8  |
| 11 | 1607.83506 | 804.42117  | F | 741.39304  | 371.20016 | 7  |
| 12 | 1704.88783 | 852.94755  | P | 594.32462  | 297.66595 | 6  |
| 13 | 1761.90930 | 881.45829  | G | 497.27185  | 249.13956 | 5  |
| 14 | 1858.96207 | 929.98467  | P | 440.25038  | 220.62883 | 4  |
| 15 | 1972.04614 | 986.52671  | I | 343.19761  | 172.10244 | 3  |
| 16 | 2069.09891 | 1035.05309 | P | 230.11354  | 115.56041 | 2  |
| 17 |            |            | N | 133.06077  | 67.03402  | 1  |

**Table S4.** HPLC purity and SMILES for the final compounds. Related to Figure 1A and 5A

| ID           | Purity (%) | SMILES                                                                                                                                                                                       |
|--------------|------------|----------------------------------------------------------------------------------------------------------------------------------------------------------------------------------------------|
| PI01         | >95        | <chem>O=C(NCCNC([C@H](CC(NC(C)(C)C)=O)NC(CCCNC(OC(C)(C)C)=O)=O)=O)C1=C(F)C=CC(C2=C(F)C=CC=C2)=C1</chem>                                                                                      |
| ART1         | >95        | <chem>C[C@]1(O[C@@]2([H])O[C@H](CC(N)=O)[C@@H]3C)CC[C@]4([H])[C@@]2(OO1)[C@@]3([H])CC[C@H]4C</chem>                                                                                          |
| ATZ1         | >95        | <chem>C[C@]1(O[C@@]2([H])O[C@H](CC(N[C@@H](CC(NC(C)(C)C)=O)C(NCCNC(C3=C(F)C=CC(C4=C(F)C=CC=C4)=C3)=O)=O)[C@@H]5C)C[C@]6([H])[C@@]2(OO1)[C@@]5([H])CC[C@H]6C</chem>                           |
| ATZ2         | >95        | <chem>C[C@]1(O[C@@]2([H])O[C@H](CC(NCC(N[C@@H](CC(NC(C)(C)C)=O)C(NCCNC(C3=C(F)C=CC(C4=C(F)C=CC=C4)=C3)=O)=O)=O)[C@@H]5C)CC[C@]6([H])[C@@]2(OO1)[C@@]5([H])CC[C@H]6C</chem>                   |
| ATZ4         | >95        | <chem>O=C(NCCNC([C@@H](NC(CCCNC(C[C@H]([C@@H]1C)O[C@]2([H])O[C@@]3(C)CC[C@]4([H])[C@@]2(OO3)[C@@]1([H])CC[C@H]4C)=O)=O)CC(NC(C)(C)C)=O)=O)C5=C(F)C=CC(C6=C(F)C=CC=C6)=C5</chem>              |
| Deoxy-ATZ4   | >95        | <chem>C[C@@](O[C@@]1([H])O[C@H](CC(NCCCC(N[C@@H](CC(NC(C)(C)C)=O)C(NCCNC(C2=C(F)C=CC(C3=C(F)C=CC=C3)=C2)=O)=O)=O)[C@@H]4C)(O5)CC[C@]6([H])[C@@]15[C@@]4([H])CC[C@H]6C</chem>                 |
| ATZ-P1       | >95        | <chem>C[C@]1(O[C@@]2([H])O[C@H](CC(N[C@@H](CCCN=[N+]=[N-])C(N[C@@H](CC(NC(C)(C)C)=O)C(NCCNC(C3=C(F)C=CC(C4=C(F)C=CC=C4)=C3)=O)=O)[C@@H]5C)CC[C@]6([H])[C@@]2(OO1)[C@@]5([H])CC[C@H]6C</chem> |
| Deoxy-ATZ-P1 | >95        | <chem>C[C@@](O[C@@]1([H])O[C@H](CC(N[C@@H](CCCN=[N+]=[N-])C(N[C@@H](CC(NC(C)(C)C)=O)C(NCCNC(C2=C(F)C=CC(C3=C(F)C=</chem>                                                                     |

---

CC=C3=C2=O=O=O)[C@@H]4C(O5)CC[C@]6([H])[C@@]15[C@@]4([H])CC[C@H]6C

---
